# Supplementary material for: Older doctors and progression through specialty training in the UK: a cohort analysis of General Medical Council data
Source: PubMed Central journal article supplement — BMJ Open. 2015 Feb 3;5(2):e005658. doi: 10.1136/bmjopen-2014-005658 (PMC4322203; doi:10.1136/bmjopen-2014-005658), 2015-02-03
Supplement: bmjopen-2014-005658.draft_revisions.pdf [file bmjopen-2014-005658.draft_revisions.pdf]

# BMJ Open

## Older doctors and progression through specialty training in the United Kingdom: a cohort analysis of General Medical Council data.

|                                 |                                                                                                                                                                                 |
|---------------------------------|---------------------------------------------------------------------------------------------------------------------------------------------------------------------------------|
| Journal:                        | <i>BMJ Open</i>                                                                                                                                                                 |
| Manuscript ID:                  | bmjopen-2014-005658                                                                                                                                                             |
| Article Type:                   | Research                                                                                                                                                                        |
| Date Submitted by the Author:   | 11-May-2014                                                                                                                                                                     |
| Complete List of Authors:       | Pyne, Vicky; University of Bristol, ; Ben-Schlomo, Yoav; Dept of Social Medicine                                                                                                |
| <b>Primary Subject Heading</b>: | Medical education and training                                                                                                                                                  |
| Secondary Subject Heading:      | Medical management                                                                                                                                                              |
| Keywords:                       | MEDICAL EDUCATION & TRAINING, Human resource management < HEALTH SERVICES ADMINISTRATION & MANAGEMENT, Organisational development < HEALTH SERVICES ADMINISTRATION & MANAGEMENT |
|                                 |                                                                                                                                                                                 |

SCHOLARONE™  
Manuscripts

1  
2  
3  
4  
5  
6  
7  
8  
9  
10  
11  
12  
13 Older doctors and progression through specialty training in the United Kingdom: a cohort analysis  
14 of General Medical Council data.  
15  
16

17  
18  
19 Vicky Pyne<sup>1</sup>, Yoav Ben-Shlomo<sup>2</sup>  
20  
21

22  
23  
24 1. Medical Student, University of Bristol Medical School  
25

26 2. Professor of Clinical Epidemiology, School of Social and Community Medicine, 39 Whatley  
27 Road, Bristol, BS8 2PS  
28  
29

30  
31  
32  
33 **Correspondence to:** Vicky Pyne (vicky.pyne@doctors.org.uk)  
34  
35  
36  
37  
38  
39  
40  
41  
42  
43  
44  
45  
46  
47  
48  
49  
50  
51  
52  
53  
54  
55  
56  
57  
58  
59  
60

## Abstract

Objective: To determine whether older age at graduation is associated with any difference in outcomes from the annual specialty training progression assessment.

Design: An open cohort of 38,308 doctors who graduated from a United Kingdom medical school with annual assessments of progression in their specialty training program with data centrally collected by the General Medical Council between 05/08/2009 to 31/07/2012.

Results: Mature junior doctors ( $\geq 28$  years at graduation) were more likely to have problems with progression on their ARCP/RITA than their younger colleagues (Odds ratio 1.34, 95% CI 1.22, 1.49,  $p < 0.001$ ). This association was, if anything, even stronger (Odds ratio 1.57, 95% CI 1.41, 1.74,  $p < 0.001$ ) after adjustment for gender, ethnicity, type of University and specialty. The same was true when only looking at the most extreme ARCP outcome (4) which is being asked to leave their specialist programme (Odds ratio 1.81, 95% CI 1.34, 2.44,  $p < 0.001$ ).

Conclusions: Mature doctors are a growing part of the medical workforce and they are likely to broaden the spectrum of doctors by bring different life experience to the profession. These results suggest that they are more likely to have problems with progressing through their specialist training programme. More research is required to determine the reasons behind these associations and how mature doctors can be supported both in choosing the best training programme and in coping with the complex demands of higher training at a later stage in their lives.

**Strengths of this Study**

1. First study to look at how age at graduation affects a doctors chances of succeeding in their annual revalidation.
2. Quantative nature of study ensures minimal sources of bias and large volume of data ensures small p-values.
3. Results are counter to prevailing beliefs and research regarding mature medical students showing that despite doing better at university, they appear to 'do worse' once they have become doctors.
4. Continues to add to the growing literature regarding how minority groups appear to struggle more with formal performance measures of doctors.

**Limitations of this Study**

5. Currently no qualitative analysis of the cause of these results.

## Introduction

Over the last decade, more mature students have been welcomed onto the medical training programme. Whilst they only make up around 4% of medical students in the UK<sup>1</sup>, they are a more substantial proportion of graduates from the USA and Canada (16.7% and 14.2% were 30 or older at graduation respectively<sup>2 3</sup>). These students are often different in their outlook and abilities to a typical school leaver and may be better suited as both a student and future doctor. For example, the former director of the graduate entry programme at St George's Hospital Medical School has stated that "mature students... are sooner and better able to handle the responsibilities of being a doctor" and are "much more self-directed, challenging, demanding, questioning, and mature" than their younger counterparts<sup>4</sup>. These subjective views have some limited support from both qualitative and quantitative research during the medical school years, for example, older students appear to do better at year 3 OSCE exams<sup>5</sup>. Two studies have suggested that mature students cope better with the transition to clinical responsibilities feeling less confused, daunted, anxious or intimidated and more likely to describe a positive transition<sup>6 7</sup>. This may not merely reflect greater academic experience; greater age at program entry, as opposed to the presence of a previous degree, was a better predictor for positive attributes and attitudes related to being a doctor<sup>8</sup>. This may reflect stronger motivational factors that lead them to positively choose medicine as a subsequent career.

Remarkably little is known about what happens to these mature graduates after they qualify. These positive attitudes could result in very focussed and determined graduates who try to reach their choice of specialist career as quickly and efficiently as possible thereby progressing through their training rapidly. On the other hand, mature graduates are more likely to have established geographical roots and family commitments that may make handling the double burdens of career and family problematic even earlier in their training as compared to younger graduates. Anecdotal evidence from the Severn Deanery has suggested that some mature students required greater support with getting through their annual assessment (previously known as RITA - Record of In

1 Training Assessment) and now referred to as ARCP (Annual Review of Competence Progression).  
2  
3 We objectively test the null hypothesis that the proportion of doctors who either require additional  
4 training time or who are asked to leave the programme is the same for both older and younger  
5  
6 graduate doctors.  
7  
8  
9

## 10 11 12 **Methods**

### 13 *Datasource and variable definitions*

14  
15 The General Medical Council, who collate the national data on ARCP/RITA, kindly provided us  
16 with an anonymised extract of data for all medical doctors who had a review between 05/08/2009 to  
17 31/07/2012. In the United Kingdom, prior to 2013, the ARCP/RITA process begins at the start of  
18 speciality training (such as surgery or primary care) and continues until completion of training  
19 (obtaining a certificate of completion of training – CCT) that enables doctors to apply for a  
20 consultant post.  
21  
22  
23  
24  
25  
26  
27  
28  
29

30  
31 Because the coding of the outcomes for ARCP and RITA do not map directly onto each other, we  
32 had to use slightly different definitions for our outcome measure of poor progression. For ARCP we  
33 used codes 3 (requires additional training time), 4 (released from the programme) and 7.3  
34 (inadequate progress) as a composite measure of poor progression. For the RITA we used codes D  
35 (targeted training) and E (intensified or repeat training) as our poor outcome measure (see appendix  
36 1 for the full coding scheme)<sup>9 10</sup>. We choose to exclude subjects with a code for insufficient  
37 evidence (as this often reflects inadequate documentation rather than poor progress per se) and  
38 those trainees on an out-of-program secondment.  
39  
40  
41  
42  
43  
44  
45  
46  
47  
48  
49

50  
51 Our exposure measure was based on an arbitrary age cut-off (coded as an integer value). There is no  
52 accepted standard definition of a “mature” student so we chose to define this as a graduate who was  
53 29 years or over at the year of first registration (i.e. year of graduation). By choosing this cut-point  
54 we hoped to not include graduates who had simply taken a gap year, intercalated BSc or a prior  
55  
56  
57  
58  
59  
60

1 degree before going straight into medicine (as this should mean they are not older than 27 years) but  
2 those who would have had some years of “work” experience outside of medicine. This is similar to  
3 a previous study that defined the “older mature” as “students who have worked in other occupations  
4 for a number of years prior to making a decision to apply to medical school”<sup>11</sup>. For secondary  
5 analyses we further sub-divided this ‘mature’ group into those aged between 29 years and 31 years  
6 and those who were 32 years or older on date of first registration to examine for any dose-response  
7 effects with older age at registration and to ensure that our results were not overly sensitive to our  
8 arbitrary cut-point. We defined, a priori, a number of potential confounders or intermediaries that  
9 could be associated with being an older graduate and a greater probability of poor progression.  
10 These were gender, specialty, ethnicity, and whether the graduate had qualified from a “mature  
11 friendly” medical school that may be better able to help the older graduate cope with the future  
12 stresses of being a doctor. This last variable was operationalized as follows: We calculated the  
13 percentage of mature students graduating from the medical school and then created a binary  
14 variable if the percentage was greater than 10% - approximately the top quartile and these were  
15 mainly the new medical schools (e.g. Exeter, Brighton & Sussex etc). We could not disaggregate  
16 the London-based medical schools as they were all coded as University of London.

### 39 *Statistical methods*

40 The original dataset had multiple records for a doctor for each assessment (long format) but this  
41 could be linked by an anonymous unique identifier. We reshaped the data into wide format (one  
42 row per doctor) so each doctor is only represented once in the dataset. If the doctor had poor  
43 progression more than once, we only coded the first event. We compared simple proportions using  
44 Chi-squared tests and linear regression for continuous variables. We then calculated the crude odds  
45 ratio (95% confidence intervals, p-values) for older age at graduation and poor progression and  
46 multivariable odds ratio adjusting for gender, ethnicity (binary variable defined as non-ethnic if  
47 ticked any of the White ethnicity codes from census or ethnic minority, which included any other  
48  
49  
50  
51  
52  
53  
54  
55  
56  
57  
58  
59  
60

code), specialty (dummy variable) and mature friendly medical school (binary variable). For specialty we used hospital medicine as the baseline group as it had the largest number of doctors. We undertook a sensitivity analysis using the most extreme outcome – leaving the training programme. As this is only explicitly coded in the ARCP outcomes, we could not use subjects with RITA assessments for this secondary analysis. We examined for potential interactions between age at registration with gender and ethnicity and either failure to progress or being asked to leave the specialty.

## Results

We received a total of 110,571 records (multiple assessments per doctor). We dropped 307 records (0.3%) without a specialty code and there were 5,173 records with a missing outcome (4.7%) and 361 records (0.3%) with an ambiguous code that we could not use (99% of the missing outcome data came from 2012, when the GMC asked Deaneries to return forms even for doctors who were not having ARCPs as they were out of programme, on maternity leave or long term sick so these are not really missing outcomes - Andy Knapton, GMC personal communication). In addition, there were 7,072 records (6.4%) for out-of-program secondments and 7,737 records (7.0%) coded as insufficient evidence leaving us with 89,921 records. After removing incomplete data for ethnicity, year of birth, registration, and graduating university, we were left with 83,702 records from 38,308 doctors (see figure 1) similar to the stated number of registered doctors (in Approved Practice Settings) as listed by the GMC <sup>12</sup>. There were 2,610 (6.8%) mature graduates (1,414 between 29 and 31 years, and 1,196  $\geq$  32 years). 83.7% of assessments were ARCP and 16.3% were from the RITA. In total, 6,045 doctors (15.8%) failed at least one ARCP or RITA during the three years of recorded data and of those, 491 (1.3%) were asked to leave the specialty programme (ARCP Outcome 4).



1 Older doctors were more likely to be male, non-ethnic minority, and train in Primary Care or Public  
2 Health ( $p < 0.001$ ) compared to younger doctors (see web table 1). Older doctors were more likely to  
3  
4 have problems with progression (odds ratio 1.34, 95% CI 1.22, 1.49,  $p$ -value  $< 0.001$ ) (table 1).  
5  
6

7  
8 After adjusting for gender, ethnicity, type of medical school, and choice of specialty, the odds ratio  
9  
10 was further increased (OR 1.57, 95% CI 1.41, 1.74,  $p < 0.001$ ). When we broke down the older age  
11  
12 group into three categories (non-mature, 29 to 31 years,  $\geq 32$  years), the trend was even more  
13  
14 marked both with and without adjustment for other covariates (OR 1.0, 1.43, 1.74 respectively,  $p$ -  
15  
16 value for trend  $< 0.001$  after multivariable adjustment).  
17  
18

19  
20  
21 Our secondary analysis using just the extreme outcome of leaving the training programme (ARCP-  
22  
23 4) found an even greater odds ratio of failing to progress for mature students compared to non-  
24  
25 matures (OR 1.81, 95% CI 1.34, 2.44,  $p < 0.001$ ). When we examined this by our three level age  
26  
27 group, we observed a non-linear trend (OR for non-mature, 29 to 31 years,  $\geq 32$  years: 1.0, 1.29,  
28  
29 2.48 respectively,  $p$ -value for trend  $< 0.001$ ) whereby the excess risk seemed mainly limited to the  
30  
31 oldest group ( $\geq 32$  years) (web table 2). There was no evidence of any interactions between  
32  
33 maturity and either gender or ethnicity on failure to progress or being asked to leave the specialty.  
34  
35  
36  
37  
38

## 39 Discussion

40  
41 This study provides strong evidence that older doctors at graduation were more likely to have  
42  
43 problems with progression at their annual assessment and were more likely to leave their initial  
44  
45 specialist training programme. These findings appeared to be independent of other factors, such as  
46  
47 gender, ethnicity, type of medical school and speciality. The last showed wide variability with some  
48  
49 specialties having higher (Obstetrics and Gynaecology) and others lower (General Practice and  
50  
51 Public Health) rates of problems with progression. This finding is consistent with the results of a  
52  
53 recent analysis comparing doctors who obtained their medical degree either in our outside of the  
54  
55  
56  
57  
58  
59  
60

1 UK and testing whether the Performance and Linguistics Assessments Board examination system  
2 explained performance at ARCP<sup>13</sup>.  
3  
4  
5  
6  
7

8 As these results are unlikely to be due to chance, one must consider other possible explanations.

9  
10 Bias in either measurement of exposure or outcome is very unlikely as age at graduation is taken  
11 from year of registration and year of birth so should be well recorded and any coding errors are  
12 likely to be random in nature. Similarly any coding errors in the ARCP/RITA outcomes are unlikely  
13 to be differential according to age at graduation. A very small proportion of outcome data were  
14 missing and again this is unlikely to have been systematically biased. Though we attempted to  
15 control for a variety of covariates that could influence the outcome, we did not have reliable data on  
16 whether trainees were in full or part time training. The latter may be more common in mature  
17 graduates and may influence progression in training. Similarly we could not explore if there was an  
18 interaction between mature graduate status and full or part time training.  
19  
20  
21  
22  
23  
24  
25  
26  
27  
28  
29  
30  
31  
32

33 One must consider several possible explanations as to why older graduates have more problems  
34 progressing through higher training if we assume our observed associations are truly causal. (a)

35 They may have more commitments outside of work (caring commitments for either children or  
36 parents or other personal relationship issues) that may make it harder to successfully complete all  
37 the assessments required for ARCP<sup>11</sup>. (b) They may find themselves committing to a specialty that  
38 may not have been their first choice in order to stay in a certain part of the country for their children  
39 or spouse. This could result in them doing less well in ARCP due a degree of ambivalence to this  
40 specialty. (c) They may have more problems passing post-graduate specialist exams which result in  
41 either additional training time or in the worst case leaving the specialty. This may be one  
42 explanation why we observed the same pattern of results with doctors of ethnic minority  
43 background who are known to have a higher failure rate with the MRCGP exam<sup>13,14</sup>. (d) The higher  
44 rate of leaving the programme in the oldest age group may reflect an inappropriate choice of  
45  
46  
47  
48  
49  
50  
51  
52  
53  
54  
55  
56  
57  
58  
59  
60

1  
2 specialty or that older graduates, having had a past career and already made one major change, have  
3  
4 more confidence to switch specialties than younger graduates.  
5  
6

7  
8 These results should not be interpreted as older graduates are therefore less competent doctors. The  
9  
10 ARCP/RITA assessments are there to monitor training progression against specific competencies  
11  
12 and milestones and are not a direct measure of the quality of doctors. Some excellent doctors simply  
13  
14 take longer to complete their training and may have gained additional skills and life experiences on  
15  
16 this journey, learning more from their mistakes than their successes.  
17  
18

19  
20 These results, however, should not be a cause for complacency. Longer training programmes exert  
21  
22 additional financial pressures on training budgets and any doctor who leaves medicine altogether at  
23  
24 this stage has had a lot of time and money invested into their training. The problem is not unique to  
25  
26 older graduates as we observed that men, ethnic minorities and some specialties showed the same  
27  
28 pattern of results.  
29  
30

31  
32 In conclusion, mature doctors are part of the makeup of the NHS workforce and they widen the  
33  
34 variety of doctors as well as bringing insights from past careers that is to be welcomed. While they  
35  
36 appear to do better than their younger counterparts at university, they are more likely to have  
37  
38 problems with specialty training in the UK. We believe that the causes for this are multi-factorial  
39  
40 and probably not unique to the United Kingdom but generalisable to other high income countries  
41  
42 like the USA and Canada, though this requires empirical confirmation. These results should be an  
43  
44 impetus for further qualitative research to provide greater insights into why older graduates are  
45  
46 more like to have difficulties in progression and direct action from training programmes so that they  
47  
48 can identify problems at an earlier stage and provide greater support for such trainees as  
49  
50 appropriate.  
51  
52  
53  
54  
55  
56  
57  
58  
59  
60

1 **Ethical approval:** We did not seek formal NHS ethical approval for this study as it was a  
2 secondary data analysis of existing data that had been anonymized to ensure data confidentiality.  
3

4 Acknowledgements: The author would like to acknowledge Andy Knapton and Daniel Smith at the  
5  
6 General Medical Council (GMC) for their support, guidance and encouragement and the GMC for  
7  
8 providing us the data for our research. Finally, we would thank Dr. Clare Van Hamel, Associate  
9  
10 Postgraduate Dean and Director of Severn Deanery Foundation School for her anecdotal comments  
11  
12 that stimulated this project.  
13  
14  
15

16  
17  
18  
19 **Conflicts of interest:** All authors have completed the ICMJE uniform disclosure form at  
20  
21 [www.icmje.org/coi\\_disclosure.pdf](http://www.icmje.org/coi_disclosure.pdf) and declare: no support from any organisation for the submitted  
22  
23 work; no financial relationships with any organisations that might have an interest in the submitted  
24  
25 work in the previous three years. VP is a mature medical student and was therefore curious to find  
26  
27 out how mature students perform after qualification. YBS has no conflict of interest but regularly  
28  
29 sits on ARCP committees for Public Health trainees. No funding was required or obtained for this  
30  
31 study.  
32  
33  
34  
35  
36

37 **Copyright Statement:** The Corresponding Author has the right to grant on behalf of all authors and  
38  
39 does grant on behalf of all authors, [a worldwide licence](#) to the Publishers and its licensees in  
40  
41 perpetuity, in all forms, formats and media (whether known now or created in the future), to i)  
42  
43 publish, reproduce, distribute, display and store the Contribution, ii) translate the Contribution into  
44  
45 other languages, create adaptations, reprints, include within collections and create summaries,  
46  
47 extracts and/or, abstracts of the Contribution, iii) create any other derivative work(s) based on the  
48  
49 Contribution, iv) to exploit all subsidiary rights in the Contribution, v) the inclusion of electronic  
50  
51 links from the Contribution to third party material where-ever it may be located; and, vi) licence  
52  
53 any third party to do any or all of the above.”  
54  
55  
56  
57  
58  
59  
60

1  
2  
3  
4  
5  
6  
7  
8  
9  
10  
11  
12  
13  
14  
15  
16  
17  
18  
19  
20  
21  
22  
23  
24  
25  
26  
27  
28  
29  
30  
31  
32  
33  
34  
35  
36  
37  
38  
39  
40  
41  
42  
43  
44  
45  
46  
47  
48  
49  
50  
51  
52  
53  
54  
55  
56  
57  
58  
59  
60

**Authors' contributions:** VP conceived of the idea for this piece of work as her student SSC and approached the GMC for data access. YBS acted as her SSC supervisor and provided support and training for the statistical analysis. VP undertook the initial data cleaning and analysis. YBS checked the analyses and undertook some additional analyses. VP drafted the first version of the paper that was then edited by YBS. All authors approved the final version of the manuscript. VP acts as the guarantor.

**Transparency declaration:** VP affirms that the manuscript is an honest, accurate, and transparent account of the study being reported; that no important aspects of the study have been omitted; and that any discrepancies from the study as planned (and, if relevant, registered) have been explained.

**Data Sharing Statement:** No additional data available.

## References

---

1. Higher Education Statistics Agency. Medicine Undergraduates Data 2012-2013.
2. Association of American Medical Colleges. Medical School Graduation Questionnaire - 2013 All Schools Summary. 2013;(August).
3. Association of American Medical Colleges. Canadian Medical School Graduation Questionnaire - 2012 All Schools Summary Report. 2012;(October).
4. McCrorie P. Graduate students are more challenging, demanding, and questioning. *BMJ*. 2002;325(7366):676. Available at: <http://www.pubmedcentral.nih.gov/articlerender.fcgi?artid=1124216&tool=pmcentrez&rendertype=abstract>. Accessed June 18, 2013.
5. Lumb AB, Vail A. Comparison of academic, application form and social factors in predicting early performance on the medical course. *Med Educ*. 2004;38(9):1002-5. doi:10.1111/j.1365-2929.2004.01912.x.
6. Shacklady J, Holmes E, Mason G, Davies I, Dornan T. Maturity and medical students' ease of transition into the clinical environment. *Med Teach*. 2009;31(7):621-6. doi:10.1080/01421590802203496.
7. Hayes K, Feather a, Hall a, et al. Anxiety in medical students: is preparation for full-time clinical attachments more dependent upon differences in maturity or on educational programmes for undergraduate and graduate entry students? *Med Educ*. 2004;38(11):1154-63. doi:10.1111/j.1365-2929.2004.01980.x.
8. Wilkinson TJ, Wells JE, Bushnell J a. Are differences between graduates and undergraduates in a medical course due to age or prior degree? *Med Educ*. 2004;38(11):1141-6. doi:10.1111/j.1365-2929.2004.01981.x.
9. Annual Review of Competence Progression (ARCP) - Severn Deanery - NHS. Available at: <http://www.severn deanery.nhs.uk/about/education-and-training/doctors-in-training/annual-review-of-competence-progression-arcp/>. Accessed June 20, 2013.
10. MMC. *The Gold Guide: A Reference Guide for Postgraduate Specialty Training in the UK (Fourth Edition)*.; 2010.
11. Mathers J, Parry J. Older mature students' experiences of applying to study medicine in England: an interview study. *Med Educ*. 2010;44(11):1084-94. doi:10.1111/j.1365-2923.2010.03731.x.
12. List of Registered Medical Practitioners - statistics. Available at: [http://www.gmc-uk.org/doctors/register/search\\_stats.asp](http://www.gmc-uk.org/doctors/register/search_stats.asp). Accessed July 15, 2013.
13. Tiffin PA, Illing J, Kasim AS. Annual Review of Competence Progression ( ARCP ) performance of doctors who passed Professional and Linguistic Assessments Board ( PLAB )

1  
2 tests compared with UK medical graduates : national data linkage study. 2014;2622(April):1-  
3 18. doi:10.1136/bmj.g2622.  
4

- 5 14. Esmail A, Roberts C. Academic performance of ethnic minority candidates and  
6 discrimination in the MRCGP examinations between 2010 and 2012: analysis of data. *BMJ*.  
7 2013;347(sep26\_2):f5662. doi:10.1136/bmj.f5662.  
8  
9  
10  
11  
12  
13  
14  
15  
16  
17  
18  
19  
20  
21  
22  
23  
24  
25  
26  
27  
28  
29  
30  
31  
32  
33  
34  
35  
36  
37  
38  
39  
40  
41  
42  
43  
44  
45  
46  
47  
48  
49  
50  
51  
52  
53  
54  
55  
56  
57  
58  
59  
60

**Table 1:** Association between ‘Mature status’ and failure to progress at ARCP adjusted for a range of potential confounders.

|                                 | <b>Model 1*</b>     |                | <b>Model 2*</b>     |                |
|---------------------------------|---------------------|----------------|---------------------|----------------|
|                                 | <b>OR (95% CI)</b>  | <b>p Value</b> | <b>OR (95% CI)</b>  | <b>p Value</b> |
| Older ( $\geq 28$ years)        | 1.34 (1.22 to 1.49) | <0.001         | 1.57 (1.41 to 1.74) | <0.001         |
| Normal age ( $\leq 28$ years)   | 1.00                |                | 1.00                |                |
| Older group (29 to 31 years)    | 1.27 (1.11 to 1.46) | 0.001          | 1.43 (1.24 to 1.65) | <0.001         |
| Oldest group ( $\geq 32$ years) | 1.43 (1.24 to 1.65) | <0.001         | 1.74 (1.50 to 2.02) | <0.001         |
| p-value for trend               |                     | <0.001         |                     | <0.001         |
| Female gender                   |                     |                | 0.82 (0.77 to 0.87) | <0.001         |
| Ethnic minority                 |                     |                | 1.59 (1.49 to 1.68) | <0.001         |
| Mature Friendly University      |                     |                | 1.18 (1.06 to 1.32) | 0.003          |
| <b>First Specialty</b>          |                     |                |                     |                |
| Medicine                        |                     |                | 1.00                |                |
| ACCS & related                  |                     |                | 1.00 (0.92 to 1.08) | 0.93           |
| Surgery                         |                     |                | 0.84 (0.77 to 0.91) | <0.001         |
| GP & Public Health              |                     |                | 0.26 (0.24 to 0.29) | <0.001         |
| O&G                             |                     |                | 2.16 (1.91 to 2.43) | <0.001         |
| Paediatrics                     |                     |                | 0.81 (0.72 to 0.90) | <0.001         |
| Pathology                       |                     |                | 0.84 (0.67 to 1.06) | 0.14           |
| Psychiatry                      |                     |                | 0.51 (0.42 to 0.63) | <0.001         |
| Radiology                       |                     |                | 0.88 (0.76 to 1.02) | 0.10           |

\*Model 1, simple odds ratio; Model 2 for binary age-group after adjustment for all covariates as shown in table except for the three level age group variable. This model was then rerun with the three level age-group and other covariates to examine for a dose-response effect



**Figure 1:** A flow chart showing losses of data due to incomplete or inadequate data to reach the final study sample.

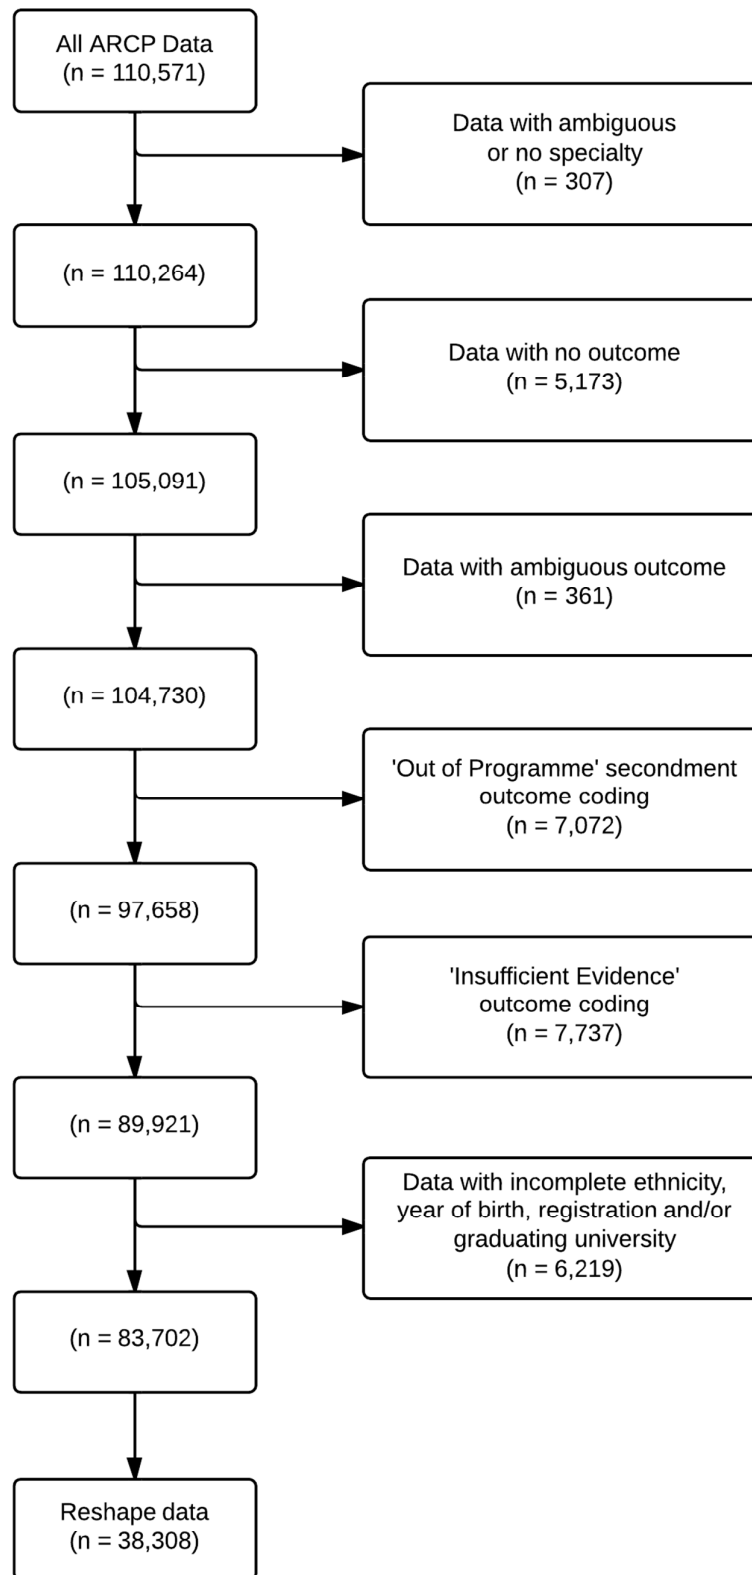

## Appendix 1: ACRP/RITA Outcome categories

| ACRP        |                                                                                                                                                                           |
|-------------|---------------------------------------------------------------------------------------------------------------------------------------------------------------------------|
| Outcome 1   | Satisfactory Progress                                                                                                                                                     |
| Outcome 2   | Unsatisfactory Progress - Development of specific competences required, additional training time not required                                                             |
| Outcome 3   | Unsatisfactory Progress - Inadequate progress by the trainee, additional training time required                                                                           |
| Outcome 4   | Unsatisfactory Progress - Released from the training programme with or without specified competences; trainee will be required to give up their National Training Number. |
| Outcome 5   | Incomplete evidence presented.                                                                                                                                            |
| Outcome 6   | Recommendation for completion of training.                                                                                                                                |
| Outcome 7   | Fixed-term specialty outcome:                                                                                                                                             |
| Outcome 7.1 | - Satisfactory progress in or completion of the LAT / FTSTA placement.                                                                                                    |
| Outcome 7.2 | - Development of Specific Competences Required – additional training time not required                                                                                    |
| Outcome 7.3 | - Inadequate progress by trainee                                                                                                                                          |
| Outcome 7.4 | - Incomplete evidence presented                                                                                                                                           |
| Outcome 8   | Out of programme for research, approved clinical training or a career break (OOPR/OOPT/OOPC).                                                                             |
| Outcome 9   | For doctors undertaking top-up training in a training post.                                                                                                               |
| RITA        |                                                                                                                                                                           |
| C           | Satisfactory progress                                                                                                                                                     |
| D           | Recommendation for targeted training                                                                                                                                      |
| E           | Records a recommendation for intensified supervision/repeated experience.                                                                                                 |
| F           | Records out-of-programme experience (including maternity leave)                                                                                                           |
| G           | Provides a final record of satisfactory progress on completion of training.                                                                                               |

**Web Table 1: Association between mature status and other covariates\***

|                                   | <b>Normal age<br/>(≤28 years)</b> | <b>Older group<br/>(29 to 31 years)</b> | <b>Oldest group<br/>(≥32 years)</b> |
|-----------------------------------|-----------------------------------|-----------------------------------------|-------------------------------------|
| <b>Gender</b>                     |                                   |                                         |                                     |
| Male                              | 43.4%<br>(15,484)                 | 50.7 % (717)                            | 53.3% (637)                         |
| Female                            | 56.6%<br>(20,214)                 | 49.3% (697)                             | 46.7% (559)                         |
| <b>Ethnic Minority</b>            |                                   |                                         |                                     |
| Non-Ethnic Minority               | 69.7%<br>(24,883)                 | 77.8%<br>(1,100)                        | 82.5% (987)                         |
| Ethnic Minority                   | 30.3%<br>(10,815)                 | 22.2% (314)                             | 17.5% (209)                         |
| <b>Graduating University</b>      |                                   |                                         |                                     |
| Mature Friendly<br>University     | 94.1%<br>(33,580)                 | 84.8%<br>(1,199)                        | 80.8% (966)                         |
| Non-Mature Friendly<br>University | 5.9% (2,118)                      | 15.2% (215)                             | 19.2% (230)                         |
| <b>First Specialty</b>            |                                   |                                         |                                     |
| Medicine                          | 94.8% (9604)                      | 2.9 (296)                               | 2.6% (235)                          |
| ACCS & related                    | 94.2% (5487)                      | 3.3% (191)                              | 2.6% (149)                          |
| Surgery                           | 93.0% (5648)                      | 4.2% (252)                              | 2.9% (177)                          |
| GP & Public Health                | 90.1% (8190)                      | 4.9% (446)                              | 5% (458)                            |
| O&G                               | 93.6% (1430)                      | 3.3% (50)                               | 3.1% (48)                           |
| Paediatrics                       | 95.9% (2674)                      | 2.6% (73)                               | 1.6% (44)                           |
| Pathology                         | 89.5% (505)                       | 5.1% (29)                               | 5.3% (30)                           |
| Psychiatry                        | 93.5% (903)                       | 3.9% (38)                               | 2.6% (25)                           |
| Radiology                         | 94.8% (1257)                      | 2.9% (39)                               | 2.3% (30)                           |
| <b>TOTAL</b>                      |                                   |                                         | <b>100%<br/>(35,698)</b>            |

\*All associations were unlikely to have occurred by chance (P<0.001)

**Web Table 2:** Multivariable association of 'Mature status' and being asked to leave specialty at ARCP (code 4) adjusted for a range of covariates\*.

|                                 | <b>OR (95% CI)</b>  | <b>p Value</b> |
|---------------------------------|---------------------|----------------|
| Older ( $\geq 28$ years)        | 1.81 (1.34 to 2.44) | <0.001         |
| Normal age ( $\leq 28$ years)   |                     |                |
| Older group (29 to 31 years)    | 1.29 (0.82 to 2.03) | 0.28           |
| Oldest group ( $\geq 32$ years) | 2.48 (1.69 to 3.62) | <0.001         |
| p-value for trend               | <0.001              |                |
| Female gender                   | 0.78 (0.65 to 0.94) | 0.01           |
| Ethnic Minority                 | 1.52 (1.26 to 1.83) | <0.001         |
| Mature Friendly University      | 1.24 (0.89 to 1.73) | 0.21           |
| <b>First Specialty</b>          |                     |                |
| ACCS & related                  | 0.99 (0.78 to 1.25) | 0.95           |
| Medicine                        | 1.0                 |                |
| Surgery                         | 0.51 (0.39 to 0.68) | <0.001         |
| GP & Public Health              | 0.22 (0.16 to 0.31) | <0.001         |
| O&G                             | 0.49 (0.25 to 0.79) | 0.005          |
| Paediatrics                     | 0.74 (0.62 to 1.25) | 0.48           |
| Pathology                       | -                   | -              |
| Psychiatry                      | 0.47 (0.24 to 0.91) | 0.03           |
| Radiology                       | 0.18 (0.07 to 0.43) | <0.0001        |

\* Model run with binary age-group after adjustment for all covariates as shown in table except for the three level age group variable. This model was then rerun with the three level age-group and other covariates to examine for a dose-response effect

# BMJ Open

## Older doctors and progression through specialty training in the United Kingdom: a cohort analysis of General Medical Council data.

|                                 |                                                                                                                                                                                 |
|---------------------------------|---------------------------------------------------------------------------------------------------------------------------------------------------------------------------------|
| Journal:                        | <i>BMJ Open</i>                                                                                                                                                                 |
| Manuscript ID:                  | bmjopen-2014-005658.R1                                                                                                                                                          |
| Article Type:                   | Research                                                                                                                                                                        |
| Date Submitted by the Author:   | 22-Sep-2014                                                                                                                                                                     |
| Complete List of Authors:       | Pyne, Vicky; University of Bristol, ; Ben-Schlomo, Yoav; Dept of Social Medicine                                                                                                |
| <b>Primary Subject Heading</b>: | Medical education and training                                                                                                                                                  |
| Secondary Subject Heading:      | Medical management                                                                                                                                                              |
| Keywords:                       | MEDICAL EDUCATION & TRAINING, Human resource management < HEALTH SERVICES ADMINISTRATION & MANAGEMENT, Organisational development < HEALTH SERVICES ADMINISTRATION & MANAGEMENT |
|                                 |                                                                                                                                                                                 |

SCHOLARONE™  
Manuscripts

1  
2  
3  
4  
5  
6  
7  
8  
9  
10  
11  
12  
13 Older doctors and progression through specialty training in the United Kingdom: a cohort analysis  
14 of General Medical Council data.  
15

16  
17  
18  
19 Vicky Pyne<sup>1</sup>, Yoav Ben-Shlomo<sup>2</sup>  
20  
21

22  
23  
24 1. Medical Student, University of Bristol Medical School  
25

26 2. Professor of Clinical Epidemiology, School of Social and Community Medicine, 39 Whatley  
27 Road, Bristol, BS8 2PS  
28  
29

30  
31  
32  
33 **Correspondence to:** Vicky Pyne ([vicky.pyne@doctors.org.uk](mailto:vicky.pyne@doctors.org.uk))  
34

35 Word count 2979  
36  
37  
38  
39  
40  
41  
42  
43  
44  
45  
46  
47  
48  
49  
50  
51  
52  
53  
54  
55  
56  
57  
58  
59  
60

**Abstract**

Objective: To determine whether older age at graduation is associated with any difference in outcomes from the annual specialty training progression assessment.

Design: An open cohort of 38,308 doctors who graduated from a United Kingdom medical school with annual assessments of progression in their specialty training program with data centrally collected by the General Medical Council between 05/08/2009 to 31/07/2012.

Results: Mature junior doctors ( $\geq 29$  years at graduation) were more likely to have problems with progression on their ARCP/RITA than their younger colleagues (Odds ratio 1.34, 95% CI 1.22, 1.49,  $p < 0.001$ ). This association was, if anything, even stronger (Odds ratio 1.57, 95% CI 1.41, 1.74,  $p < 0.001$ ) after adjustment for gender, ethnicity, type of University and specialty. The same was true when only looking at the most extreme ARCP outcome (4) which is being asked to leave their specialist programme (Odds ratio 1.81, 95% CI 1.34, 2.44,  $p < 0.001$ ).

Conclusions: Mature doctors are a growing part of the medical workforce and they are likely to broaden the spectrum of doctors by bring different life experience to the profession. These results suggest that they are more likely to have problems with progressing through their specialist training programme. More research is required to determine the reasons behind these associations and how mature doctors can be supported both in choosing the best training programme and in coping with the complex demands of higher training at a later stage in their lives.

**Strengths of this Study**

1. First study to look at how age at graduation affects a doctor's chance of succeeding in their annual revalidation.
2. Large sample size with little missing data and minimal sources of bias for exposure and outcome variables.
3. Results are counter to prevailing beliefs that mature medical students cope better with medical training as demonstrates greater problems with progression through the ARCP process.
4. Highlights the importance of other demographic and clinical factors that determine progression in training.

**Limitations of this Study**

5. No quantitative or qualitative data to try to understand the reasons for worse progression and to what degree these are or are not academic related.
6. ARCP data is a simple measure of adequate progression and does not capture excellence so could hide a bimodal distribution whereby mature junior doctors are also more likely to excel as well as have problems of progression.



## Introduction

Over the last decade, more mature students have been welcomed onto the medical training programme. Whilst they only make up around 4% of medical students in the UK<sup>1</sup>, they are a more substantial proportion of graduates from the USA and Canada (16.7% and 14.2% were 30 or older at graduation respectively<sup>2 3</sup>). These students are often different in their outlook and abilities to a typical school leaver and may be better suited as both a student and future doctor. For example, the former director of the graduate entry programme at St George's Hospital Medical School has stated that "mature students... are sooner and better able to handle the responsibilities of being a doctor" and are "much more self-directed, challenging, demanding, questioning, and mature" than their younger counterparts<sup>4</sup>. These subjective views have some limited support from both qualitative and quantitative research during the medical school years, for example, older students appear to do better at year 3 OSCE exams<sup>5</sup>. Two studies have suggested that mature students cope better with the transition to clinical responsibilities feeling less confused, daunted, anxious or intimidated and more likely to describe a positive transition<sup>6 7</sup>. This may not merely reflect greater academic experience; greater age at program entry, as opposed to the presence of a previous degree, was a better predictor for positive attributes and attitudes related to being a doctor<sup>8</sup>. This may reflect stronger motivational factors that lead them to positively choose medicine as a subsequent career.

Remarkably little is known about what happens to these mature graduates after they qualify. These positive attitudes could result in very focussed and determined graduates who try to reach their choice of specialist career as quickly and efficiently as possible thereby progressing through their training rapidly. On the other hand, mature graduates are more likely to have established geographical roots and family commitments that may make handling the double burdens of career and family problematic even earlier in their training as compared to younger graduates. Anecdotal evidence from the Severn Deanery has suggested that some mature students required greater support with getting through their annual assessment (previously known as RITA - Record of In

1 Training Assessment) and now referred to as ARCP (Annual Review of Competence Progression).  
2  
3 We objectively test the null hypothesis that the proportion of doctors who either require additional  
4  
5 training time or who are asked to leave the programme is the same for both older and younger  
6  
7 graduate doctors.  
8  
9

## 10 11 12 **Methods**

### 13 *Datasource and variable definitions*

14  
15 The General Medical Council, who collate the national data on ARCP/RITA, kindly provided us  
16  
17 with an anonymised extract of data for all UK medical graduates who had a review between  
18  
19 05/08/2009 to 31/07/2012. In the United Kingdom, prior to 2013, the ARCP/RITA process begins  
20  
21 at the start of speciality training (such as surgery or primary care) and continues until completion of  
22  
23 training (obtaining a certificate of completion of training – CCT) that enables doctors to apply for a  
24  
25 consultant post.  
26  
27  
28  
29

30  
31 Because the coding of the outcomes for ARCP and RITA do not map directly onto each other, we  
32  
33 had to use slightly different definitions for our outcome measure of poor progression. For ARCP we  
34  
35 used codes 3 (requires additional training time), 4 (released from the programme) and 7.3  
36  
37 (inadequate progress) as a composite measure of poor progression. For the RITA we used codes D  
38  
39 (targeted training) and E (intensified or repeat training) as our poor outcome measure (see appendix  
40  
41 1 for the full coding scheme)<sup>9 10</sup>. We choose to exclude subjects with a code for insufficient  
42  
43 evidence (as this often reflects inadequate documentation rather than poor progress per se) and  
44  
45 those trainees on an out-of-program secondment.  
46  
47  
48  
49

50  
51 Our exposure measure was based on an arbitrary age cut-off (coded as an integer value). There is no  
52  
53 accepted standard definition of a “mature” student so we chose to define this as a graduate who was  
54  
55 29 years or over at the year of first registration (i.e. year of graduation). By choosing this cut-point  
56  
57 we hoped to not include graduates who had simply taken a gap year, intercalated BSc or a prior  
58  
59  
60

1 degree before going straight into medicine (as this should mean they are not older than 27 years) but  
2 those who would have had some years of “work” experience outside of medicine. This is similar to  
3 a previous study that defined the “older mature” as “students who have worked in other occupations  
4 for a number of years prior to making a decision to apply to medical school”<sup>11</sup>. We further sub-  
5 divided this ‘mature’ group into those aged between 29 years and 31 years and those who were 32  
6 years or older on date of first registration to examine for any dose-response effects with older age at  
7 registration. Finally for a sensitivity analysis we examined a more detailed classification of the  
8 younger baseline group into the following categories ( $\leq 23, 24, 25, 26, 27, 28$  years). We defined, a  
9 priori, a number of potential confounders or intermediaries that could be associated with being an  
10 older graduate and a greater probability of poor progression. These were gender, specialty,  
11 ethnicity, and whether the graduate had qualified from a “mature friendly” medical school that may  
12 be better able to help the older graduate cope with the future stresses of being a doctor. This last  
13 variable was operationalized as follows: We calculated the percentage of mature students  
14 graduating from the medical school and then created a binary variable if the percentage was greater  
15 than 10% - approximately the top quartile and these were mainly the new medical schools (e.g.  
16 Exeter, Brighton & Sussex etc.). We could not disaggregate all the London-based medical schools  
17 as they were all coded as University of London.

### 41 *Statistical methods*

42 The original dataset had multiple records for a doctor for each assessment (long format) but this  
43 could be linked by an anonymous unique identifier. We reshaped the data into wide format (one  
44 row per doctor) so each doctor is only represented once in the dataset. If the doctor had poor  
45 progression more than once, we only coded the first event. We compared simple proportions using  
46 Chi-squared tests and linear regression for continuous variables. We then calculated the crude odds  
47 ratio (95% confidence intervals, p-values) for older age at graduation and poor progression and  
48 multivariable odds ratio adjusting for gender, ethnicity (binary variable defined as non-ethnic if  
49  
50  
51  
52  
53  
54  
55  
56  
57  
58  
59  
60

1  
2  
3  
4  
5  
6  
7  
8  
9  
10  
11  
12  
13  
14  
15  
16  
17  
18  
19  
20  
21  
22  
23  
24  
25  
26  
27  
28  
29  
30  
31  
32  
33  
34  
35  
36  
37  
38  
39  
40  
41  
42  
43  
44  
45  
46  
47  
48  
49  
50  
51  
52  
53  
54  
55  
56  
57  
58  
59  
60

ticked any of the White ethnicity codes from census or ethnic minority, which included any other code), specialty (dummy variable) and mature friendly medical school (binary variable). For specialty we used hospital medicine as the baseline group as it had the largest number of doctors. We undertook a sensitivity analysis using the most extreme outcome – leaving the training programme. As this is only explicitly coded in the ARCP outcomes, we could not use subjects with RITA assessments for this secondary analysis. We examined for potential interactions between age at registration with gender and ethnicity and either failure to progress or being asked to leave the specialty.

## Results

We received a total of 110,571 records (multiple assessments per doctor). We dropped 307 records (0.3%) without a specialty code and there were 5,173 records with a missing outcome (4.7%) and 361 records (0.3%) with an ambiguous code that we could not use (99% of the missing outcome data came from 2012, when the GMC asked Deaneries to return forms even for doctors who were not having ARCPs as they were out of programme, on maternity leave or long term sick so these are not really missing outcomes - Andy Knapton, GMC personal communication). In addition, there were 7,072 records (6.4%) for out-of-program secondments and 7,737 records (7.0%) coded as insufficient evidence leaving us with 89,921 records. After removing incomplete data for ethnicity, year of birth, year of registration, and graduating university, we were left with 83,702 records from 38,308 doctors (see figure 1) similar to the stated number of registered doctors (in Approved Practice Settings) as listed by the GMC<sup>12</sup>. There were 2,610 (6.8%) mature graduates (1,414 between 29 and 31 years, and 1,196  $\geq$  32 years). 83.7% of assessments were ARCP and 16.3% were from the RITA. In total, 6,045 doctors (15.8%) failed at least one ARCP or RITA during the three years of recorded data and of those, 491 (1.3%) were asked to leave the specialty programme (ARCP Outcome 4).

1  
2 Older doctors were more likely to be male, non-ethnic minority, and train in Primary Care or Public  
3 Health ( $p < 0.001$ ) compared to younger doctors (see web table 1). Older doctors were more likely to  
4 have problems with progression (odds ratio 1.34, 95% CI 1.22, 1.49,  $p$ -value  $< 0.001$ ) (table 1).  
5  
6 After adjusting for gender, ethnicity, type of medical school, and choice of specialty, the odds ratio  
7 was further increased (OR 1.57, 95% CI 1.41, 1.74,  $p < 0.001$ ). When we broke down the older age  
8 group into three categories (non-mature, 29 to 31 years,  $\geq 32$  years), the trend was even more  
9 marked both with and without adjustment for other covariates (OR 1.0, 1.43, 1.74 respectively,  $p$ -  
10 value for trend  $< 0.001$  after multivariable adjustment). Our more detailed breakdown of the younger  
11 age group suggested that increased problems with progression are evident at a younger age, 26  
12 years and above, though the oldest group ( $\geq 32$  years) appear to have additional problems (see web  
13 table 2).  
14  
15  
16  
17  
18  
19  
20  
21  
22  
23  
24  
25  
26  
27

28 Our secondary analysis using just the extreme outcome of leaving the training programme (ARCP-  
29 4) found an even greater odds ratio of failing to progress for mature students compared to non-  
30 matures (OR 1.81, 95% CI 1.34, 2.44,  $p < 0.001$ ). When we examined this by our three level age  
31 group, we observed a non-linear trend (OR for non-mature, 29 to 31 years,  $\geq 32$  years: 1.0, 1.29,  
32 2.48 respectively,  $p$ -value for trend  $< 0.001$ ) whereby the excess risk seemed mainly limited to the  
33 oldest group ( $\geq 32$  years) (web table 3). There was no evidence of any interactions between  
34 maturity and either gender or ethnicity on failure to progress or being asked to leave the specialty.  
35 The results were essentially unchanged when we replaced the type of university with a dummy  
36 variable for all universities.  
37  
38  
39  
40  
41  
42  
43  
44  
45  
46  
47  
48  
49  
50

## 51 Discussion

52 This study provides strong evidence that doctors who are older at graduation were more likely to  
53 have problems with progression at their annual assessment and were more likely to leave their  
54 initial specialist training programme. These findings appeared to be independent of other factors,  
55  
56  
57  
58  
59  
60

1 such as gender, ethnicity, type of medical school and speciality. The last showed wide variability  
2  
3 with some specialties having higher (Obstetrics and Gynaecology) and others lower (General  
4  
5 Practice and Public Health) rates of problems with progression. This finding is consistent with the  
6  
7 results of a recent analysis comparing doctors who obtained their medical degree either in or outside  
8  
9 of the UK and testing whether the Performance and Linguistics Assessments Board examination  
10  
11 system explained performance at ARCP<sup>13</sup>. While the null hypothesis defined ‘mature’ graduates as  
12  
13 those over 28 years at first registration, additional analysis has highlighted this effect is evident for  
14  
15 doctors as young as 26 on registration, who make up over 20% of the doctor population in this  
16  
17 sample.  
18  
19  
20  
21

22  
23 As these results are unlikely to be due to chance, one must consider other possible explanations.  
24  
25 Bias in either measurement of exposure or outcome is very unlikely as age at graduation is taken  
26  
27 from year of registration and year of birth so should be well recorded and any coding errors are  
28  
29 likely to be random in nature. Similarly any coding errors in the ARCP/RITA outcomes are unlikely  
30  
31 to be differential according to age at graduation. A very small proportion of outcome data were  
32  
33 missing and this is unlikely to have been systematically biased. Though we attempted to control for  
34  
35 a variety of covariates that could influence the outcome, we did not have reliable data on whether  
36  
37 trainees were in full or part time training. The latter may be more common in mature graduates and  
38  
39 may influence progression in training. Similarly we could not explore if there was an interaction  
40  
41 between mature graduate status and full or part time training. In addition, ARCP is not intended to  
42  
43 capture excellence in training but merely adequate progression. It is possible that the performance  
44  
45 of mature graduates is bimodal so that some mature doctors actually have better outcomes but this  
46  
47 would not be evident in our analysis.  
48  
49  
50  
51

52  
53  
54  
55 One must consider several possible explanations as to why older graduates have more problems  
56  
57 progressing through higher training if we assume our observed associations are truly causal. (a)  
58  
59  
60

1  
2 They may have more commitments outside of work (caring commitments for either children or  
3  
4 parents or other personal relationship issues) that may make it harder to successfully complete all  
5  
6 the assessments required for ARCP<sup>11</sup>. (b) They may find themselves committing to a specialty that  
7  
8 may not have been their first choice in order to stay in a certain part of the country for their children  
9  
10 or spouse. This could result in them doing less well in ARCP due a degree of ambivalence to this  
11  
12 specialty. (c) They may have more problems passing post-graduate specialist exams or completing  
13  
14 more technical skills competencies which result in either additional training time or in the worst  
15  
16 case leaving the specialty. This may be one explanation why we observed the same difficulty with  
17  
18 progression for doctors of ethnic minority background who are known to have a higher failure rate  
19  
20 with the MRCGP exam<sup>13,14</sup>. (d) Being older, these doctors may find it harder to engage with the  
21  
22 informal social support groups among junior doctors (either due to personal commitments or the age  
23  
24 gap) and thus have fewer resources to call upon during challenging rotations or clinical situations.  
25  
26 (e) The higher rate of leaving the programme in the oldest age group may reflect an inappropriate  
27  
28 choice of specialty or that older graduates, having had a past career and already made one major  
29  
30 change, have more confidence to switch specialties than younger graduates.  
31  
32  
33  
34  
35  
36

37 These results should not be interpreted as older graduates are therefore less competent doctors. The  
38  
39 ARCP/RITA assessments are there to monitor training progression against specific competencies  
40  
41 and milestones and are not a direct measure of the quality of doctors. Some excellent doctors simply  
42  
43 take longer to complete their training and may have gained additional skills and life experiences on  
44  
45 this journey, learning more from their mistakes than their successes.  
46  
47  
48  
49

50 These results, however, should not be a cause for complacency. Longer training programmes exert  
51  
52 additional financial pressures on training budgets and any doctor who leaves medicine altogether at  
53  
54 this stage has had a lot of time and money invested into their training. The problem is not unique to  
55  
56  
57  
58  
59  
60

1  
2 older graduates as we observed that men, ethnic minorities and some specialties showed the same  
3  
4 pattern of results.  
5  
6  
7

8  
9 In conclusion, mature doctors are part of the makeup of the NHS workforce and they widen the  
10 variety of doctors as well as bringing insights from past careers that is to be welcomed. While they  
11 appear to do better than their younger counterparts at university, they are more likely to have  
12 problems with specialty training in the UK. We believe that the causes for this are multi-factorial  
13 and probably not unique to the United Kingdom but generalisable to other high income countries  
14 like the USA and Canada, though this requires empirical confirmation. These results should be an  
15 impetus for further qualitative research to provide greater insights into why older graduates are  
16 more like to have difficulties in progression and direct action from training programmes so that they  
17 can identify problems at an earlier stage and provide greater support for such trainees as  
18 appropriate.  
19  
20  
21  
22  
23  
24  
25  
26  
27  
28  
29

30 **Ethical approval:** We did not seek formal NHS ethical approval for this study as it was a  
31 secondary data analysis of existing data that had been anonymized to ensure data confidentiality.  
32  
33  
34  
35  
36

37 **Acknowledgements:** The author would like to acknowledge Andy Knapton and Daniel Smith at the  
38 General Medical Council (GMC) for their support, guidance and encouragement and the GMC for  
39 providing us the data for our research. Finally, we would thank Dr. Clare Van Hamel, Associate  
40 Postgraduate Dean and Director of Severn Deanery Foundation School for her anecdotal comments  
41 that stimulated this project.  
42  
43  
44  
45  
46  
47  
48  
49

50 **Conflicts of interest:** All authors have completed the ICMJE uniform disclosure form at  
51 [www.icmje.org/coi\\_disclosure.pdf](http://www.icmje.org/coi_disclosure.pdf) and declare: no support from any organisation for the submitted  
52 work; no financial relationships with any organisations that might have an interest in the submitted  
53 work in the previous three years. VP is a mature medical student and was therefore curious to find  
54  
55  
56  
57  
58  
59  
60



1 out how mature students perform after qualification. YBS has no conflict of interest but regularly  
2 sits on ARCP committees for Public Health trainees. No funding was required or obtained for this  
3 study.  
4  
5  
6  
7  
8  
9

10 **Copyright Statement:** The Corresponding Author has the right to grant on behalf of all authors and  
11 does grant on behalf of all authors, [a worldwide licence](#) to the Publishers and its licensees in  
12 perpetuity, in all forms, formats and media (whether known now or created in the future), to i)  
13 publish, reproduce, distribute, display and store the Contribution, ii) translate the Contribution into  
14 other languages, create adaptations, reprints, include within collections and create summaries,  
15 extracts and/or, abstracts of the Contribution, iii) create any other derivative work(s) based on the  
16 Contribution, iv) to exploit all subsidiary rights in the Contribution, v) the inclusion of electronic  
17 links from the Contribution to third party material where-ever it may be located; and, vi) licence  
18 any third party to do any or all of the above.”  
19  
20  
21  
22  
23  
24  
25  
26  
27  
28  
29  
30  
31  
32

33 **Authors' contributions:** VP conceived of the idea for this piece of work as her student SSC and  
34 approached the GMC for data access. YBS acted as her SSC supervisor and provided support and  
35 training for the statistical analysis. VP undertook the initial data cleaning and analysis. YBS  
36 checked the analyses and undertook some additional analyses. VP drafted the first version of the  
37 paper that was then edited by YBS. All authors approved the final version of the manuscript. VP  
38 acts as the guarantor.  
39  
40  
41  
42  
43  
44  
45  
46  
47

48 **Transparency declaration:** VP affirms that the manuscript is an honest, accurate, and transparent  
49 account of the study being reported; that no important aspects of the study have been omitted; and  
50 that any discrepancies from the study as planned (and, if relevant, registered) have been explained.  
51  
52  
53  
54  
55  
56

57 **Data Sharing Statement:** No additional data available.  
58  
59  
60

## References

---

1. Higher Education Statistics Agency. Medicine Undergraduates Data 2012-2013.
2. Association of American Medical Colleges. Medical School Graduation Questionnaire - 2013 All Schools Summary. 2013;(August).
3. Association of American Medical Colleges. Canadian Medical School Graduation Questionnaire - 2012 All Schools Summary Report. 2012;(October).
4. McCrorie P. Graduate students are more challenging, demanding, and questioning. *BMJ*. 2002;325(7366):676. Available at: <http://www.pubmedcentral.nih.gov/articlerender.fcgi?artid=1124216&tool=pmcentrez&rendertype=abstract>. Accessed June 18, 2013.
5. Lumb AB, Vail A. Comparison of academic, application form and social factors in predicting early performance on the medical course. *Med Educ*. 2004;38(9):1002-5. doi:10.1111/j.1365-2929.2004.01912.x.
6. Shacklady J, Holmes E, Mason G, Davies I, Dornan T. Maturity and medical students' ease of transition into the clinical environment. *Med Teach*. 2009;31(7):621-6. doi:10.1080/01421590802203496.
7. Hayes K, Feather a, Hall a, et al. Anxiety in medical students: is preparation for full-time clinical attachments more dependent upon differences in maturity or on educational programmes for undergraduate and graduate entry students? *Med Educ*. 2004;38(11):1154-63. doi:10.1111/j.1365-2929.2004.01980.x.
8. Wilkinson TJ, Wells JE, Bushnell J a. Are differences between graduates and undergraduates in a medical course due to age or prior degree? *Med Educ*. 2004;38(11):1141-6. doi:10.1111/j.1365-2929.2004.01981.x.
9. Annual Review of Competence Progression (ARCP) - Severn Deanery - NHS. Available at: <http://www.severn deanery.nhs.uk/about/education-and-training/doctors-in-training/annual-review-of-competence-progression-arcp/>. Accessed June 20, 2013.
10. MMC. *The Gold Guide: A Reference Guide for Postgraduate Specialty Training in the UK (Fourth Edition)*.; 2010.
11. Mathers J, Parry J. Older mature students' experiences of applying to study medicine in England: an interview study. *Med Educ*. 2010;44(11):1084-94. doi:10.1111/j.1365-2923.2010.03731.x.
12. List of Registered Medical Practitioners - statistics. Available at: [http://www.gmc-uk.org/doctors/register/search\\_stats.asp](http://www.gmc-uk.org/doctors/register/search_stats.asp). Accessed July 15, 2013.
13. Tiffin PA, Illing J, Kasim AS. Annual Review of Competence Progression ( ARCP ) performance of doctors who passed Professional and Linguistic Assessments Board ( PLAB ) tests compared with UK medical graduates : national data linkage study. 2014;2622(April):1-18. doi:10.1136/bmj.g2622.

- 1  
2  
3  
4  
5  
6  
7  
8  
9  
10  
11  
12  
13  
14  
15  
16  
17  
18  
19  
20  
21  
22  
23  
24  
25  
26  
27  
28  
29  
30  
31  
32  
33  
34  
35  
36  
37  
38  
39  
40  
41  
42  
43  
44  
45  
46  
47  
48  
49  
50  
51  
52  
53  
54  
55  
56  
57  
58  
59  
60
14. Esmail A, Roberts C. Academic performance of ethnic minority candidates and discrimination in the MRCGP examinations between 2010 and 2012: analysis of data. *BMJ*. 2013;347(sep26\_2):f5662. doi:10.1136/bmj.f5662.

For peer review only

**Table 1:** Association between ‘Mature status’ and failure to progress at ARCP adjusted for a range of potential confounders.

|                                         | <b>Model 1*</b>     |                | <b>Model 2*</b>     |                |
|-----------------------------------------|---------------------|----------------|---------------------|----------------|
|                                         | <b>OR (95% CI)</b>  | <b>p Value</b> | <b>OR (95% CI)</b>  | <b>p Value</b> |
| Older (≥29 years)<br>(2,610)            | 1.34 (1.22 to 1.49) | <0.001         | 1.57 (1.41 to 1.74) | <0.001         |
| Younger group (≤28 years)<br>(35,698)   | 1.00                |                | 1.00                |                |
| Older group (29 to 31 years)<br>(1,414) | 1.27 (1.11 to 1.46) | 0.001          | 1.43 (1.24 to 1.65) | <0.001         |
| Oldest group (≥32 years)<br>(1,196)     | 1.43 (1.24 to 1.65) | <0.001         | 1.74 (1.50 to 2.02) | <0.001         |
| p-value for trend                       |                     | <0.001         |                     | <0.001         |
| Female gender<br>(21,470)               |                     |                | 0.82 (0.77 to 0.87) | <0.001         |
| Ethnic minority<br>(11,338)             |                     |                | 1.59 (1.49 to 1.68) | <0.001         |
| Mature Friendly University<br>(35,745)  |                     |                | 1.18 (1.06 to 1.32) | 0.003          |
| <b>First Specialty</b>                  |                     |                |                     |                |
| Medicine (10,135)                       |                     |                | 1.00                |                |
| ACCS & related (5,827)                  |                     |                | 1.00 (0.92 to 1.08) | 0.93           |
| Surgery (6,077)                         |                     |                | 0.84 (0.77 to 0.91) | <0.001         |
| GP & Public Health (9,094)              |                     |                | 0.26 (0.24 to 0.29) | <0.001         |
| O&G (1,528)                             |                     |                | 2.16 (1.91 to 2.43) | <0.001         |
| Paediatrics (2,791)                     |                     |                | 0.81 (0.72 to 0.90) | <0.001         |
| Pathology (564)                         |                     |                | 0.84 (0.67 to 1.06) | 0.14           |
| Psychiatry (966)                        |                     |                | 0.51 (0.42 to 0.63) | <0.001         |
| Radiology (1,326)                       |                     |                | 0.88 (0.76 to 1.02) | 0.10           |

\*Model 1, simple odds ratio; Model 2 for binary age-group after adjustment for all covariates as shown in table except for the three level age group variable. This model was then rerun with the three level age-group and other covariates to examine for a dose-response effect

Style Definition: Hyperlink

1  
2  
3  
4  
5  
6  
7  
8  
9  
10  
11  
12  
13  
14  
15  
16 Older doctors and progression through specialty training in the United Kingdom: a cohort analysis  
17 of General Medical Council data.  
18

19  
20  
21 Vicky Pyne<sup>1</sup>-, Yoav Ben-Shlomo<sup>2</sup>  
22

23  
24  
25 1. Medical Student, University of Bristol Medical School  
26

27 2. Professor of Clinical Epidemiology, School of Social and Community Medicine, 39 Whatley  
28 Road, Bristol, BS8 2PS  
29  
30

31  
32  
33 **Correspondence to:** Vicky Pyne (~~[vicky.pyne@doctors.org.uk](mailto:vicky.pyne@doctors.org.uk)~~)([vicky.pyne@doctors.org.uk](mailto:vicky.pyne@doctors.org.uk))  
34

35 [Word count 2979](#)  
36  
37  
38  
39  
40  
41  
42  
43  
44  
45  
46  
47  
48  
49  
50  
51  
52  
53  
54  
55  
56  
57  
58  
59  
60

1  
2  
3  
4  
5  
6 **Ethical approval:** We did not seek formal NHS ethical approval for this study as it was a  
7  
8 secondary data analysis of existing data that had been anonymized to ensure data confidentiality.  
9

10  
11 **Acknowledgements:** The author would like to acknowledge Andy Knapton and Daniel Smith at the  
12  
13 General Medical Council (GMC) for their support, guidance and encouragement and the GMC for  
14  
15 providing us the data for our research. Finally, we would thank Dr. Clare Van Hamel, Associate  
16  
17 Postgraduate Dean and Director of Severn Deanery Foundation School for her anecdotal comments  
18  
19 that stimulated this project.  
20

21  
22  
23 **Conflicts of interest:** All authors have completed the ICMJE uniform disclosure form at  
24  
25 [www.icmje.org/coi\\_disclosure.pdf](http://www.icmje.org/coi_disclosure.pdf) and declare: no support from any organisation for the submitted  
26  
27 work; no financial relationships with any organisations that might have an interest in the submitted  
28  
29 work in the previous three years. VP is a mature medical student and was therefore curious to find  
30  
31 out how mature students perform after qualification. YBS has no conflict of interest but regularly  
32  
33 sits on ARCP committees for Public Health trainees. No funding was required or obtained for this  
34  
35 study.  
36

37  
38 **Copyright Statement:** The Corresponding Author has the right to grant on behalf of all authors and  
39  
40 does grant on behalf of all authors, [a worldwide licence](#) to the Publishers and its licensees in  
41  
42 perpetuity, in all forms, formats and media (whether known now or created in the future), to i)  
43  
44 publish, reproduce, distribute, display and store the Contribution, ii) translate the Contribution into  
45  
46 other languages, create adaptations, reprints, include within collections and create summaries,  
47  
48 extracts and/or, abstracts of the Contribution, iii) create any other derivative work(s) based on the  
49  
50 Contribution, iv) to exploit all subsidiary rights in the Contribution, v) the inclusion of electronic  
51  
52 links from the Contribution to third party material where-ever it may be located; and, vi) licence  
53  
54 any third party to do any or all of the above.”  
55

1  
2  
3  
4  
5  
6  
7  
8 | **Authors' ~~contributions~~contributions:** VP conceived of the idea for this piece of work as her  
9 student SSC and approached the GMC for data access. YBS acted as her SSC supervisor and  
10 provided support and training for the statistical analysis. VP undertook the initial data cleaning and  
11 analysis. YBS checked the analyses and undertook some additional analyses. VP drafted the first  
12 version of the paper that was then edited by YBS. All authors approved the final version of the  
13 manuscript. VP acts as the guarantor.  
14  
15  
16  
17  
18  
19

20  
21 **Transparency declaration:** VP affirms that the manuscript is an honest, accurate, and transparent  
22 account of the study being reported; that no important aspects of the study have been omitted; and  
23 that any discrepancies from the study as planned (and, if relevant, registered) have been explained.  
24  
25  
26  
27

28  
29 **Data Sharing Statement:** No additional data available.  
30  
31  
32  
33  
34  
35  
36  
37  
38  
39  
40  
41  
42  
43  
44  
45  
46  
47  
48  
49  
50  
51  
52  
53  
54  
55  
56  
57  
58  
59  
60

**Abstract**

Objective: To determine whether older age at graduation is associated with any difference in outcomes from the annual specialty training progression assessment.

Design: An open cohort of 38,308 doctors who graduated from a United Kingdom medical school with annual assessments of progression in their specialty training program with data centrally collected by the General Medical Council between 05/08/2009 to 31/07/2012.

Results: Mature junior doctors ( $\geq 28.29$  years at graduation) were more likely to have problems with progression on their ARCP/RITA than their younger colleagues (Odds ratio 1.34, 95% CI 1.22, 1.49,  $p < 0.001$ ). This association was, if anything, even stronger (Odds ratio 1.57, 95% CI 1.41, 1.74,  $p < 0.001$ ) after adjustment for gender, ethnicity, type of University and specialty. The same was true when only looking at the most extreme ARCP outcome (4) which is being asked to leave their specialist programme (Odds ratio 1.81, 95% CI 1.34, 2.44,  $p < 0.001$ ).

Conclusions: Mature doctors are a growing part of the medical workforce and they are likely to broaden the spectrum of doctors by bring different life experience to the profession. These results suggest that they are more likely to have problems with progressing through their specialist training programme. More research is required to determine the reasons behind these associations and how mature doctors can be supported both in choosing the best training programme and in coping with the complex demands of higher training at a later stage in their lives.



### Strengths of this Study

1. First study to look at how age at graduation affects a ~~doctors chances~~doctor's chance of succeeding in their annual revalidation.
2. ~~Quantative nature of study ensures~~Large sample size with little missing data and minimal sources of bias and large volume of data ensures small p values for exposure and outcome variables.
3. ~~Results are counter to prevailing beliefs and research regarding that~~ mature medical students ~~showing that despite doing~~cope better ~~at university, they appear to 'do worse' once they have become doctors.~~
- 4.3 ~~Continues to add to~~with medical training as demonstrates greater problems with progression through the growing literature regarding how minority groups appear to struggle more with formal performance measures of doctors ARCP process.
4. Highlights the importance of other demographic and clinical factors that determine progression in training.

### Limitations of this Study

5. ~~Currently no~~No quantitative or qualitative analysis of data to try to understand the cause of reasons for worse progression and to what degree these results are or are not academic related.
- 5.6 ARCP data is a simple measure of adequate progression and does not capture excellence so could hide a bimodal distribution whereby mature junior doctors are also more likely to excel as well as have problems of progression.

## Introduction

Over the last decade, more mature students have been welcomed onto the medical training programme. Whilst they only make up around 4% of medical students in the UK<sup>1</sup>, they are a more substantial proportion of graduates from the USA and Canada (16.7% and 14.2% were 30 or older at graduation respectively<sup>2 3</sup>). These students are often different in their outlook and abilities to a typical school leaver and may be better suited as both a student and future doctor. For example, the former director of the graduate entry programme at St George's Hospital Medical School has stated that "mature students... are sooner and better able to handle the responsibilities of being a doctor" and are "much more self-directed, challenging, demanding, questioning, and mature" than their younger counterparts<sup>4</sup>. These subjective views have some limited support from both qualitative and quantitative research during the medical school years, for example, older students appear to do better at year 3 OSCE exams<sup>5</sup>. Two studies have suggested that mature students cope better with the transition to clinical responsibilities feeling less confused, daunted, anxious or intimidated and more likely to describe a positive transition<sup>6 7</sup>. This may not merely reflect greater academic experience; greater age at program entry, as opposed to the presence of a previous degree, was a better predictor for positive attributes and attitudes related to being a doctor<sup>8</sup>. This may reflect stronger motivational factors that lead them to positively choose medicine as a subsequent career.

Remarkably little is known about what happens to these mature graduates after they qualify. These positive attitudes could result in very focussed and determined graduates who try to reach their choice of specialist career as quickly and efficiently as possible thereby progressing through their training rapidly. On the other hand, mature graduates are more likely to have established geographical roots and family commitments that may make handling the double burdens of career and family problematic even earlier in their training as compared to younger graduates. Anecdotal evidence from the Severn Deanery has suggested that some mature students required greater support with getting through their annual assessment (previously known as RITA - Record of In

1  
2  
3  
4  
5  
6 Training Assessment) and now referred to as ARCP (Annual Review of Competence Progression).

7  
8 We objectively test the null hypothesis that the proportion of doctors who either require additional  
9  
10 training time or who are asked to leave the programme is the same for both older and younger  
11  
12 graduate doctors.  
13

## 14 15 **Methods**

### 16 *Datasource and variable definitions*

17  
18 The General Medical Council, who collate the national data on ARCP/RITA, kindly provided us  
19  
20 with an anonymised extract of data for all UK medical ~~doctors~~graduates who had a review between  
21  
22 05/08/2009 to 31/07/2012. In the United Kingdom, prior to 2013, the ARCP/RITA process begins  
23  
24 at the start of speciality training (such as surgery or primary care) and continues until completion of  
25  
26 training (obtaining a certificate of completion of training – CCT) that enables doctors to apply for a  
27  
28 consultant post.  
29  
30

31  
32 Because the coding of the outcomes for ARCP and RITA do not map directly onto each other, we  
33  
34 had to use slightly different definitions for our outcome measure of poor progression. For ARCP we  
35  
36 used codes 3 (requires additional training time), 4 (released from the programme) and 7.3  
37  
38 (inadequate progress) as a composite measure of poor progression. For the RITA we used codes D  
39  
40 (targeted training) and E (intensified or repeat training) as our poor outcome measure (see appendix  
41  
42 1 for the full coding scheme)<sup>9 10</sup>. We choose to exclude subjects with a code for insufficient  
43  
44 evidence (as this often reflects inadequate documentation rather than poor progress per se) and  
45  
46 those trainees on an out-of-program secondment.  
47

48  
49 Our exposure measure was based on an arbitrary age cut-off (coded as an integer value). There is no  
50  
51 accepted standard definition of a “mature” student so we chose to define this as a graduate who was  
52  
53 29 years or over at the year of first registration (i.e. year of graduation). By choosing this cut-point  
54  
55 we hoped to not include graduates who had simply taken a gap year, intercalated BSc or a prior  
56

1  
2  
3  
4  
5  
6 degree before going straight into medicine (as this should mean they are not older than 27 years) but  
7  
8 those who would have had some years of “work” experience outside of medicine. This is similar to  
9  
10 a previous study that defined the “older mature” as “students who have worked in other occupations  
11  
12 for a number of years prior to making a decision to apply to medical school”<sup>11</sup>. ~~For secondary~~  
13 ~~analyses we~~ We further sub-divided this ‘mature’ group into those aged between 29 years and 31  
14  
15 years and those who were 32 years or older on date of first registration to examine for any dose-  
16  
17 response effects with older age at registration ~~and to ensure that our results were not overly~~  
18  
19 ~~sensitive to our arbitrary cut point.~~ Finally for a sensitivity analysis we examined a more detailed  
20  
21 classification of the younger baseline group into the following categories ( $\leq 23, 24, 25, 26, 27, 28$   
22  
23 years). We defined, a priori, a number of potential confounders or intermediaries that could be  
24  
25 associated with being an older graduate and a greater probability of poor progression. These were  
26  
27 gender, specialty, ethnicity, and whether the graduate had qualified from a “mature friendly”  
28  
29 medical school that may be better able to help the older graduate cope with the future stresses of  
30  
31 being a doctor. This last variable was operationalized as follows: We calculated the percentage of  
32  
33 mature students graduating from the medical school and then created a binary variable if the  
34  
35 percentage was greater than 10% - approximately the top quartile and these were mainly the new  
36  
37 medical schools (e.g. Exeter, Brighton & Sussex etc.). We could not disaggregate all the London-  
38  
39 based medical schools as they were all coded as University of London.

#### 41 42 *Statistical methods*

43  
44 The original dataset had multiple records for a doctor for each assessment (long format) but this  
45  
46 could be linked by an anonymous unique identifier. We reshaped the data into wide format (one  
47  
48 row per doctor) so each doctor is only represented once in the dataset. If the doctor had poor  
49  
50 progression more than once, we only coded the first event. We compared simple proportions using  
51  
52 Chi-squared tests and linear regression for continuous variables. We then calculated the crude odds  
53  
54 ratio (95% confidence intervals, p-values) for older age at graduation and poor progression and  
55  
56  
57  
58  
59  
60

1  
2  
3  
4  
5  
6 multivariable odds ratio adjusting for gender, ethnicity (binary variable defined as non-ethnic if  
7 ticked any of the White ethnicity codes from census or ethnic minority, which included any other  
8 code), specialty (dummy variable) and mature friendly medical school (binary variable). For  
9  
10 specialty we used hospital medicine as the baseline group as it had the largest number of doctors.  
11  
12 We undertook a sensitivity analysis using the most extreme outcome – leaving the training  
13 programme. As this is only explicitly coded in the ARCP outcomes, we could not use subjects with  
14 RITA assessments for this secondary analysis. We examined for potential interactions between age  
15 at registration with gender and ethnicity and either failure to progress or being asked to leave the  
16 specialty.  
17  
18  
19  
20  
21  
22  
23  
24

## 25 Results

26 We received a total of 110,571 records (multiple assessments per doctor). We dropped 307 records  
27 (0.3%) without a specialty code and there were 5,173 records with a missing outcome (4.7%) and  
28 361 records (0.3%) with an ambiguous code that we could not use (99% of the missing outcome  
29 data came from 2012, when the GMC asked Deaneries to return forms even for doctors who were  
30 not having ARCPs as they were out of programme, on maternity leave or long term sick so these are  
31 not really missing outcomes - Andy Knapton, GMC personal communication). In addition, there  
32 were 7,072 records (6.4%) for out-of-program secondments and 7,737 records (7.0%) coded as  
33 insufficient evidence leaving us with 89,921 records~~921 records~~. After removing incomplete data for  
34 ethnicity, year of birth, year of registration, and graduating university, we were left with 83,702  
35 records from 38,308 doctors (see figure 1) similar to the stated number of registered doctors (in  
36 Approved Practice Settings) as listed by the GMC <sup>12</sup>. There were 2,610 (6.8%) mature graduates  
37 (1,414 between 29 and 31 years, and 1,196  $\geq$  32 years). 83.7% of assessments were ARCP and  
38 16.3% were from the RITA. In total, 6,045 doctors (15.8%) failed at least one ARCP or RITA  
39 during the three years of recorded data and of those, 491 (1.3%) were asked to leave the specialty  
40 programme (ARCP Outcome 4).  
41  
42  
43  
44  
45  
46  
47  
48  
49  
50  
51  
52  
53  
54  
55  
56  
57  
58  
59  
60

1  
2  
3  
4  
5  
6  
7  
8 Older doctors were more likely to be male, non-ethnic minority, and train in Primary Care or Public  
9 Health (p<0.001) compared to younger doctors (see web table 1). Older doctors were more likely to  
10 have problems with progression (odds ratio 1.34, 95% CI 1.22, 1.49, p-value <0.001) (table 1).  
11  
12 After adjusting for gender, ethnicity, type of medical school, and choice of specialty, the odds ratio  
13 was further increased (OR 1.57, 95% CI 1.41, 1.74, p<0.001). When we broke down the older age  
14 group into three categories (non-mature, 29 to 31 years, ≥ 32 years), the trend was even more  
15 marked both with and without adjustment for other covariates (OR 1.0, 1.43, 1.74 respectively, p-  
16 value for trend <0.001 after multivariable adjustment). [Our more detailed breakdown of the younger  
17 age group suggested that increased problems with progression are evident at a younger age, 26  
18 years and above, though the oldest group \(≥ 32 years \) appear to have additional problems \(see web  
19 table 2\).](#)

20  
21  
22  
23  
24  
25  
26  
27  
28  
29  
30 Our secondary analysis using just the extreme outcome of leaving the training programme (ARCP-  
31 4) found an even greater odds ratio of failing to progress for mature students compared to non-  
32 matures (OR 1.81, 95% CI 1.34, 2.44, p<0.001). When we examined this by our three level age  
33 group, we observed a non-linear trend (OR for non-mature, 29 to 31 years, ≥ 32 years: 1.0, 1.29,  
34 2.48 respectively, p-value for trend <0.001) whereby the excess risk seemed mainly limited to the  
35 oldest group (≥ 32 years) (web table 23). There was no evidence of any interactions between  
36 maturity and either gender or ethnicity on failure to progress or being asked to leave the specialty.  
37  
38 [The results were essentially unchanged when we replaced the type of university with a dummy  
39 variable for all universities.](#)

## 40 Discussion

41 This study provides strong evidence that ~~older~~ doctors [who are older](#) at graduation were more likely  
42 to have problems with progression at their annual assessment and were more likely to leave their  
43  
44  
45  
46  
47  
48  
49  
50

1  
2  
3  
4  
5  
6 initial specialist training programme. These findings appeared to be independent of other factors,  
7  
8 such as gender, ethnicity, type of medical school and speciality. The last showed wide variability  
9  
10 with some specialties having higher (Obstetrics and Gynaecology) and others lower (General  
11  
12 Practice and Public Health) rates of problems with progression. This finding is consistent with the  
13  
14 results of a recent analysis comparing doctors who obtained their medical degree either in ~~our~~  
15  
16 outside of the UK and testing whether the Performance and Linguistics Assessments Board  
17  
18 examination system explained performance at ARCP <sup>13</sup>. While the null hypothesis defined 'mature'  
19  
20 graduates as those over 28 years at first registration, additional analysis has highlighted this effect is  
21  
22 evident for doctors as young as 26 on registration, who make up over 20% of the doctor population  
23  
24 in this sample.

25  
26  
27 As these results are unlikely to be due to chance, one must consider other possible explanations.  
28  
29 Bias in either measurement of exposure or outcome is very unlikely as age at graduation is taken  
30  
31 from year of registration and year of birth so should be well recorded and any coding errors are  
32  
33 likely to be random in nature. Similarly any coding errors in the ARCP/RITA outcomes are unlikely  
34  
35 to be differential according to age at graduation. A very small proportion of outcome data were  
36  
37 missing and ~~again~~ this is unlikely to have been systematically biased. Though we attempted to  
38  
39 control for a variety of covariates that could influence the outcome, we did not have reliable data on  
40  
41 whether trainees were in full or part time training. The latter may be more common in mature  
42  
43 graduates and may influence progression in training. Similarly we could not explore if there was an  
44  
45 interaction between mature graduate status and full or part time training. In addition, ARCP is not  
46  
47 intended to capture excellence in training but merely adequate progression. It is possible that the  
48  
49 performance of mature graduates is bimodal so that some mature doctors actually have better  
50  
51 outcomes but this would not be evident in our analysis.

1  
2  
3  
4  
5  
6 One must consider several possible explanations as to why older graduates have more problems  
7 progressing through higher training if we assume our observed associations are truly causal. (a)  
8 They may have more commitments outside of work (caring commitments for either children or  
9 parents or other personal relationship issues) that may make it harder to successfully complete all  
10 the assessments required for ARCP<sup>11</sup>. (b) They may find themselves committing to a specialty that  
11 may not have been their first choice in order to stay in a certain part of the country for their children  
12 or spouse. This could result in them doing less well in ARCP due a degree of ambivalence to this  
13 specialty. (c) They may have more problems passing post-graduate specialist exams or completing  
14 more technical skills competencies which result in either additional training time or in the worst  
15 case leaving the specialty. This may be one explanation why we observed the same pattern of  
16 results difficulty with progression for doctors of ethnic minority background who are known to have  
17 a higher failure rate with the MRCGP exam<sup>13,14</sup>. (d) Being older, these doctors may find it  
18 harder to engage with the informal social support groups among junior doctors (either due to  
19 personal commitments or the age gap) and thus have fewer resources to call upon during  
20 challenging rotations or clinical situations. (e) The higher rate of leaving the programme in the  
21 oldest age group may reflect an inappropriate choice of specialty or that older graduates, having had  
22 a past career and already made one major change, have more confidence to switch specialties than  
23 younger graduates.  
24  
25  
26  
27  
28  
29  
30  
31  
32  
33  
34  
35  
36  
37  
38  
39  
40  
41

42 These results should not be interpreted as older graduates are therefore less competent doctors. The  
43 ARCP/RITA assessments are there to monitor training progression against specific competencies  
44 and milestones and are not a direct measure of the quality of doctors. Some excellent doctors simply  
45 take longer to complete their training and may have gained additional skills and life experiences on  
46 this journey, learning more from their mistakes than their successes.  
47  
48  
49  
50  
51  
52  
53  
54  
55  
56  
57  
58  
59  
60



1  
2  
3  
4  
5  
6 These results, however, should not be a cause for complacency. Longer training programmes exert  
7 additional financial pressures on training budgets and any doctor who leaves medicine altogether at  
8 this stage has had a lot of time and money invested into their training. The problem is not unique to  
9 older graduates as we observed that men, ethnic minorities and some specialties showed the same  
10 pattern of results.  
11  
12  
13  
14

15  
16  
17 In conclusion, mature doctors are part of the makeup of the NHS workforce and they widen the  
18 variety of doctors as well as bringing insights from past careers that is to be welcomed. While they  
19 appear to do better than their younger counterparts at university, they are more likely to have  
20 problems with specialty training in the UK. We believe that the causes for this are multi-factorial  
21 and probably not unique to the United Kingdom but generalisable to other high income countries  
22 like the USA and Canada, though this requires empirical confirmation. These results should be an  
23 impetus for further qualitative research to provide greater insights into why older graduates are  
24 more like to have difficulties in progression and direct action from training programmes so that they  
25 can identify problems at an earlier stage and provide greater support for such trainees as  
26 appropriate.  
27  
28  
29  
30  
31  
32  
33  
34  
35  
36  
37  
38  
39  
40  
41  
42  
43  
44  
45  
46  
47  
48  
49  
50  
51  
52  
53  
54  
55  
56  
57  
58  
59  
60

## References

---

1. Higher Education Statistics Agency. Medicine Undergraduates Data 2012-2013.
2. Association of American Medical Colleges. Medical School Graduation Questionnaire - 2013 All Schools Summary. 2013;(August).
3. Association of American Medical Colleges. Canadian Medical School Graduation Questionnaire - 2012 All Schools Summary Report. 2012;(October).
4. McCrorie P. Graduate students are more challenging, demanding, and questioning. *BMJ*. 2002;325(7366):676. Available at: <http://www.pubmedcentral.nih.gov/articlerender.fcgi?artid=1124216&tool=pmcentrez&rendertype=abstract>. Accessed June 18, 2013.
5. Lumb AB, Vail A. Comparison of academic, application form and social factors in predicting early performance on the medical course. *Med Educ*. 2004;38(9):1002-5. doi:10.1111/j.1365-2929.2004.01912.x.
6. Shacklady J, Holmes E, Mason G, Davies I, Dornan T. Maturity and medical students' ease of transition into the clinical environment. *Med Teach*. 2009;31(7):621-6. doi:10.1080/01421590802203496.
7. Hayes K, Feather a, Hall a, et al. Anxiety in medical students: is preparation for full-time clinical attachments more dependent upon differences in maturity or on educational programmes for undergraduate and graduate entry students? *Med Educ*. 2004;38(11):1154-63. doi:10.1111/j.1365-2929.2004.01980.x.
8. Wilkinson TJ, Wells JE, Bushnell J a. Are differences between graduates and undergraduates in a medical course due to age or prior degree? *Med Educ*. 2004;38(11):1141-6. doi:10.1111/j.1365-2929.2004.01981.x.
9. Annual Review of Competence Progression (ARCP) - Severn Deanery - NHS. Available at: <http://www.severndeanery.nhs.uk/about/education-and-training/doctors-in-training/annual-review-of-competence-progression-arcp/>. Accessed June 20, 2013.
10. MMC. *The Gold Guide: A Reference Guide for Postgraduate Specialty Training in the UK (Fourth Edition)*.; 2010.
11. Mathers J, Parry J. Older mature students' experiences of applying to study medicine in England: an interview study. *Med Educ*. 2010;44(11):1084-94. doi:10.1111/j.1365-2923.2010.03731.x.
12. List of Registered Medical Practitioners - statistics. Available at: [http://www.gmc-uk.org/doctors/register/search\\_stats.asp](http://www.gmc-uk.org/doctors/register/search_stats.asp). Accessed July 15, 2013.
13. Tiffin PA, Illing J, Kasim AS. Annual Review of Competence Progression ( ARCP ) performance of doctors who passed Professional and Linguistic Assessments Board ( PLAB ) tests compared with UK medical graduates : national data linkage study. 2014;2622(April):1-18. doi:10.1136/bmj.g2622.

- 1  
2  
3  
4  
5  
6 14. Esmail A, Roberts C. Academic performance of ethnic minority candidates and  
7 discrimination in the MRCGP examinations between 2010 and 2012: analysis of data. *BMJ*.  
8 2013;347(sep26\_2):f5662. doi:10.1136/bmj.f5662.  
9  
10  
11  
12  
13  
14  
15  
16  
17  
18  
19  
20  
21  
22  
23  
24  
25  
26  
27  
28  
29  
30  
31  
32  
33  
34  
35  
36  
37  
38  
39  
40  
41  
42  
43  
44  
45  
46  
47  
48  
49  
50  
51  
52  
53  
54  
55  
56  
57  
58  
59  
60

**Table 1:** Association between ‘Mature status’ and failure to progress at ARCP adjusted for a range of potential confounders.

|                                                         | Model 1*            |         | Model 2*            |         |
|---------------------------------------------------------|---------------------|---------|---------------------|---------|
|                                                         | OR (95% CI)         | p Value | OR (95% CI)         | p Value |
| Older ( $\geq 29$ years)<br>(2,610)                     | 1.34 (1.22 to 1.49) | <0.001  | 1.57 (1.41 to 1.74) | <0.001  |
| Normal age Younger group ( $\leq 28$ years)<br>(35,698) | 1.00                |         | 1.00                |         |
| Older group (29 to 31 years)<br>(1,414)                 | 1.27 (1.11 to 1.46) | 0.001   | 1.43 (1.24 to 1.65) | <0.001  |
| Oldest group ( $\geq 32$ years)<br>(1,196)              | 1.43 (1.24 to 1.65) | <0.001  | 1.74 (1.50 to 2.02) | <0.001  |
| p-value for trend                                       |                     | <0.001  |                     | <0.001  |
| Female gender<br>(21,470)                               |                     |         | 0.82 (0.77 to 0.87) | <0.001  |
| Ethnic minority<br>(11,338)                             |                     |         | 1.59 (1.49 to 1.68) | <0.001  |
| Mature Friendly University<br>(35,745)                  |                     |         | 1.18 (1.06 to 1.32) | 0.003   |
| <b>First Specialty</b>                                  |                     |         |                     |         |
| Medicine (10,135)                                       |                     |         | 1.00                |         |
| ACCS & related (5,827)                                  |                     |         | 1.00 (0.92 to 1.08) | 0.93    |
| Surgery (6,077)                                         |                     |         | 0.84 (0.77 to 0.91) | <0.001  |
| GP & Public Health (9,094)                              |                     |         | 0.26 (0.24 to 0.29) | <0.001  |
| O&G (1,528)                                             |                     |         | 2.16 (1.91 to 2.43) | <0.001  |
| Paediatrics (2,791)                                     |                     |         | 0.81 (0.72 to 0.90) | <0.001  |
| Pathology (564)                                         |                     |         | 0.84 (0.67 to 1.06) | 0.14    |
| Psychiatry (966)                                        |                     |         | 0.51 (0.42 to 0.63) | <0.001  |
| Radiology (1,326)                                       |                     |         | 0.88 (0.76 to 1.02) | 0.10    |

Formatted Table

\* Model 1, simple odds ratio; Model 2 for binary age-group after adjustment for all covariates as shown in table except for the three level age group variable. This model was then rerun with the three level age-group and other covariates to examine for a dose-response effect

**Figure 1:** A flow chart showing losses of data due to incomplete or inadequate data to reach the final study sample.

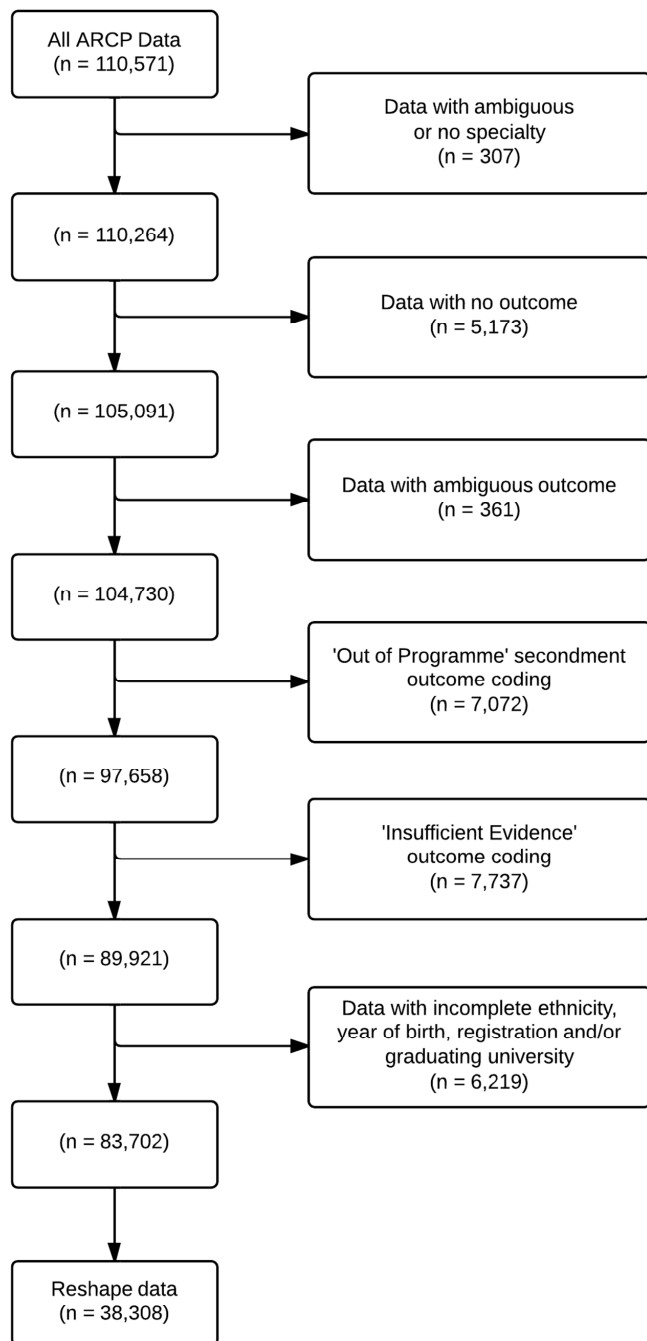

## Appendix 1: ACRP/RITA Outcome categories

| ARCP        |                                                                                                                                                                           |
|-------------|---------------------------------------------------------------------------------------------------------------------------------------------------------------------------|
| Outcome 1   | Satisfactory Progress                                                                                                                                                     |
| Outcome 2   | Unsatisfactory Progress - Development of specific competences required, additional training time not required                                                             |
| Outcome 3   | Unsatisfactory Progress - Inadequate progress by the trainee, additional training time required                                                                           |
| Outcome 4   | Unsatisfactory Progress - Released from the training programme with or without specified competences; trainee will be required to give up their National Training Number. |
| Outcome 5   | Incomplete evidence presented.                                                                                                                                            |
| Outcome 6   | Recommendation for completion of training.                                                                                                                                |
| Outcome 7   | Fixed-term specialty outcome:                                                                                                                                             |
| Outcome 7.1 | - Satisfactory progress in or completion of the LAT / FTSTA placement.                                                                                                    |
| Outcome 7.2 | - Development of Specific Competences Required – additional training time not required                                                                                    |
| Outcome 7.3 | - Inadequate progress by trainee                                                                                                                                          |
| Outcome 7.4 | - Incomplete evidence presented                                                                                                                                           |
| Outcome 8   | Out of programme for research, approved clinical training or a career break (OOPR/OOPT/OOPC).                                                                             |
| Outcome 9   | For doctors undertaking top-up training in a training post.                                                                                                               |
| RITA        |                                                                                                                                                                           |
| C           | Satisfactory progress                                                                                                                                                     |
| D           | Recommendation for targeted training                                                                                                                                      |
| E           | Records a recommendation for intensified supervision/repeated experience.                                                                                                 |
| F           | Records out-of-programme experience (including maternity leave)                                                                                                           |
| G           | Provides a final record of satisfactory progress on completion of training.                                                                                               |

Formatted Table

Web Table 1: Association between mature status and other covariates\*

|                                | Normal age<br>(≤28 years) | Older group<br>(29 to 31 years) | Oldest group<br>(≥32 years) |
|--------------------------------|---------------------------|---------------------------------|-----------------------------|
| Gender                         |                           |                                 |                             |
| Male                           | 43.4% (15,484)            | 50.7 % (717)                    | 53.3% (637)                 |
| Female                         | 56.6% (20,214)            | 49.3% (697)                     | 46.7% (559)                 |
| Ethnic Minority                |                           |                                 |                             |
| Non-Ethnic Minority            | 69.7% (24,883)            | 77.8% (1,100)                   | 82.5% (987)                 |
| Ethnic Minority                | 30.3% (10,815)            | 22.2% (314)                     | 17.5% (209)                 |
| Graduating University          |                           |                                 |                             |
| Mature Friendly University     | 94.1% (33,580)            | 84.8% (1,199)                   | 80.8% (966)                 |
| Non-Mature Friendly University | 5.9% (2,118)              | 15.2% (215)                     | 19.2% (230)                 |
| First Specialty                |                           |                                 |                             |
| Medicine                       | 94.8% (9,604)             | 2.9 (296)                       | 2.6% (235)                  |
| ACCS & related                 | 94.2% (5,487)             | 3.3% (191)                      | 2.6% (149)                  |
| Surgery                        | 93.0% (5,648)             | 4.2% (252)                      | 2.9% (177)                  |
| GP & Public Health             | 90.1% (8,190)             | 4.9% (446)                      | 5% (458)                    |
| O&G                            | 93.6% (1,430)             | 3.3% (50)                       | 3.1% (48)                   |
| Paediatrics                    | 95.9% (2,674)             | 2.6% (73)                       | 1.6% (44)                   |
| Pathology                      | 89.5% (505)               | 5.1% (29)                       | 5.3% (30)                   |
| Psychiatry                     | 93.5% (903)               | 3.9% (38)                       | 2.6% (25)                   |
| Radiology                      | 94.8% (1,257)             | 2.9% (39)                       | 2.3% (30)                   |
| TOTAL                          |                           |                                 | 100% (35,698)               |

\*All associations were unlikely to have occurred by chance ( $p < 0.001$ )

Web Table 2: Multivariable association of age at graduation and failure to progress at ARCP using more detailed age-bands and adjusted for a range of potential confounders.

|                                          | OR (95% CI)         | p Value |
|------------------------------------------|---------------------|---------|
| ≤ 23 years old (8,453)                   | 1.05 (0.97 to 1.14) | 0.23    |
| 24 years old (13,997)                    | 1.0                 |         |
| 25 years old (7,951)                     | 1.12 (1.04 to 1.21) | <0.001  |
| 26 years old (2,738)                     | 1.50 (1.35 to 1.67) | <0.001  |
| 27 years old (1,614)                     | 1.50 (1.31 to 1.72) | <0.001  |
| 28 years old (945)                       | 1.55 (1.30 to 1.84) | <0.001  |
| 29 to 31 years old (Older group) (1,414) | 1.6 (1.38 to 1.85)  | <0.001  |
| ≥ 32 years old (Oldest group) (1,196)    | 1.95 (1.67 to 2.28) | <0.001  |
| p-value for trend                        | <0.001              |         |
| Female gender                            | 0.83 (0.78 to 0.88) | <0.001  |
| Ethnic Minority                          | 1.59 (1.50 to 1.69) | <0.001  |
| Mature Friendly University               | 1.12 (1.00 to 1.26) | 0.04    |
| <b>First Specialty</b>                   |                     |         |
| ACCS & related                           | 1.00 (0.92 to 1.08) | 0.91    |
| Medicine                                 | 1.0                 |         |
| Surgery                                  | 0.84 (0.77 to 0.91) | <0.001  |
| GP & Public Health                       | 0.26 (0.23 to 0.29) | <0.001  |
| O&G                                      | 2.13 (1.89 to 2.40) | <0.001  |
| Paediatrics                              | 0.81 (0.72 to 0.91) | <0.001  |
| Pathology                                | 0.83 (0.66 to 1.05) | 0.12    |
| Psychiatry                               | 0.50 (0.41 to 0.62) | <0.001  |
| Radiology                                | 0.89 (0.77 to 1.03) | 0.13    |



Web Table 3: Multivariable association of 'Mature status' and being asked to leave specialty at ARCP (code 4) adjusted for a range of covariates\*.

|                                  | OR (95% CI)         | p Value |
|----------------------------------|---------------------|---------|
| Older ( $\geq 29$ years)         | 1.81 (1.34 to 2.44) | <0.001  |
| Younger group ( $\leq 28$ years) |                     |         |
| Older group (29 to 31 years)     | 1.29 (0.82 to 2.03) | 0.28    |
| Oldest group ( $\geq 32$ years)  | 2.48 (1.69 to 3.62) | <0.001  |
| p-value for trend                | <0.001              |         |
| Female gender                    | 0.78 (0.65 to 0.94) | 0.01    |
| Ethnic Minority                  | 1.52 (1.26 to 1.83) | <0.001  |
| Mature Friendly University       | 1.24 (0.89 to 1.73) | 0.21    |
| First Specialty                  |                     |         |
| ACCS & related                   | 0.99 (0.78 to 1.25) | 0.95    |
| Medicine                         | 1.0                 |         |
| Surgery                          | 0.51 (0.39 to 0.68) | <0.001  |
| GP & Public Health               | 0.22 (0.16 to 0.31) | <0.001  |
| O&G                              | 0.49 (0.25 to 0.79) | 0.005   |
| Paediatrics                      | 0.74 (0.62 to 1.25) | 0.48    |
| Pathology                        | -                   | -       |
| Psychiatry                       | 0.47 (0.24 to 0.91) | 0.03    |
| Radiology                        | 0.18 (0.07 to 0.43) | <0.0001 |

\* Model run with binary age-group after adjustment for all covariates as shown in table except for the three level age group variable. This model was then rerun with the three level age-group and other covariates to examine for a dose-response effect

1  
2  
3 Reviewer(s) Comments to Author:

4 Reviewer: 1

5 Reviewer Name Kevin Hayes

6 Institution and Country St George's University London, UK

7 Please state any competing interests or state 'None declared': I am a first author on one of the cited  
8 references in this paper but None declared  
9

10 There is a clear, important research question and testing of a Null hypothesis with an appropriate study  
11 design. The conclusions are clear and not overstated. Strengths and weaknesses are clearly stated.  
12 I would take issue with strength 3 at the beginning as written:

13  
14 "Results are counter to prevailing beliefs and research regarding mature medical students showing that  
15 despite doing better at university, they appear to 'do worse' once they have become doctors"  
16 The results do not necessarily mean these doctors "do worse" it is simply a measure of specific outcomes -  
17 this is actually acknowledged in the discussion section, so this assertion needs to be clarified in line with  
18 the discussion section.

19  
20 *We thank Mr. Hayes for this comment and agree with his suggestion. We have amended this accordingly.*

21  
22  
23 The study does offer potential reasons for the findings but clearly and correctly states that the study does  
24 not prove them just raises more potential qualitative research questions about this important cohort of  
25 doctors. There are several mentions of other "minority groups" having similar outcomes. They may have  
26 similar outcomes but they are different cohorts and cannot necessarily be compared to this cohort - it  
27 needs to be clearer in the discussion what "association" if any these findings have  
28

29  
30 *We are sorry if this was not clear. We were referring to the similarly increased risk of problems with  
31 progression as assessed by the ARCP process. We have clarified this.*

32  
33 Overall a very good study - a few minor revisions as above only

34  
35 *We thank Mr. Hayes for his positive comments and suggestions.*  
36  
37  
38

39 Reviewer: 2

40 Reviewer Name John C. Mclachlan

41 Institution and Country Durham University

42 Please state any competing interests or state 'None declared': None Declared  
43  
44

45 This is an important topic which is likely to court controversy. I believe it deserves publication in principal  
46 but some important issues should be addressed prior to this.

47 1) The manuscript should also be reviewed by someone with very high level understanding of previous  
48 work in this area. I suggest Professor Chris McManus, UCL and/or Dr Paul Tiffin, Durham. I believe more  
49 sophisticated analyses could be done, and would prove informative.  
50

51 2) The authors are correct that large numbers give small p values. What matters is the effect size, and  
52 the authors should calculate a value for this. An Odds Ratio, of course, is not an effect size.  
53

54 *We generally prefer to use the simplest statistical methods if we can as this is easier to interpret for the  
55 average reader. In our experience, more sophisticated analyses can occasionally be more informative but  
56 in general support the conclusions from simpler analyses. We agree about the issue of effect estimates  
57 rather than p-values however we are confused by the statement that an odds ratio is not an effect estimate.  
58 We note that this is the same effect estimate used by Tiffin et al (BMJ 2014).*  
59  
60

1  
2  
3  
4 3) The authors should comment that the data is right-censored – there is no ‘excellent’ category above  
5 mere progression. If therefore older graduates showed greater variance than school leaver graduates, then  
6 this would be undetectable in the current study. It could be that mature students do generally make better  
7 doctors overall, as a variety of soft measures seem to suggest, but a small proportion of them struggle for  
8 the career reasons mentioned. These results therefore do not necessarily contradict previous  
9 understandings.

10  
11 *This is a very cogent point and we agree with Dr. Mclachlan that because of a potential ceiling effect, we*  
12 *could be missing a bimodal distribution so that mature doctors could be both having problems and doing*  
13 *excellently. We have added this to the limitations and discussion.*

14  
15  
16 4) The authors should refer more widely to previous work on age effects in doctors – for instance Norcini  
17 et al (2013) Medical Care 51;1034-1039.

18  
19 *We thank Prof. Mclachlan for highlighting this reference and note that this paper relates to a doctor's years*  
20 *since graduation as opposed to their age.*

21  
22  
23 This is well worth pursuing!

24  
25  
26 *We thank Prof. Mclachlan for his positive comments and suggestions.*

27  
28  
29  
30 Reviewer: 3

31 Reviewer Name Chris McManus

32 Institution and Country UCL, UK

33 Please state any competing interests or state ‘None declared’: None declared

34  
35  
36 This is an interesting paper, which looks at career progression of UK trained doctors through ARCP in  
37 relation to age at graduation. It makes the strong claim that doctors who are older at qualification perform  
38 less well. That however does seem to contradict other evidence (and, for instance, older graduates on  
39 accelerated undergraduate courses seem to perform substantially better in examinations in medical school,  
40 and therefore presumably are likely to do better on postgraduate training; see BMC Med Ed, Mahesan et  
41 al, 2011, 11:76). That raises a number of questions about the present study which need resolving. In view  
42 of the recent paper by Tiffin et al in the BMJ on ARCP I have used that in comparison with the present  
43 study, not least as the datasets seem to overlap substantially but the conclusions potentially seem  
44 incompatible.

45  
46 *We thank Prof. McManus for his positive comments and agree that there is overlap between the datasets*  
47 *we have used and that by Tiffin et al. (we were unaware of this work at the time we were conducting our*  
48 *analyses) however we do not believe that the findings are contradictory (see comments below).*

49  
50 1. ARCP/RITA classifications are complex, and Tiffin et al chose as ‘satisfactory codes 1, 6, C and G,  
51 whereas the present chooses as unsatisfactory 3,4,7.3, D and E, which is not the complement of the Tiffin  
52 classification. Tiffin et al also use ordinal regression, since the classifications can be classified in some  
53 form of hierarchy. There is an argument for also carrying out the current study using the Tiffin approach.

54  
55 *We have compared our codes with Tiffin et al and for RITA they are complementary as the missing code F*  
56 *reflects out of programme experience. There are discrepancies for the ARCP codes. We specifically chose*  
57 *to not include code 2 and we justified our reasons for this in the paper. In the experience of one of the*  
58 *authors as an ARCP assessor, code 2 is most often used for trainees with inadequate documentation not*  
59  
60

1  
2  
3 *poor progression. The panel will give an outcome 2 with the proviso that this is converted to a 1 if the*  
4 *trainee provides this within a reasonable time frame.*

5  
6  
7  
8 2. Tiffin et al also excluded "ARCP outcomes related to examination failure". That raises important  
9 questions about whether age is related to academic or non-academic problems, and it would be useful to  
10 have similar analyses for the present data.

11 *Tiffin et. al. included international graduates which we specifically excluded and hence looks at PLAB*  
12 *examination results. Our hypothesis was to test whether more mature doctors have greater difficulty in*  
13 *progressing through postgraduate training and clearly examination failure is one potential reason. We*  
14 *would not wish to exclude this reason for failure to progress and specifically mention this potential*  
15 *explanation in the discussion. Furthermore, the ARCP dataset does not include the reason for failure*  
16 *(whether academic or non-academic).*

17  
18  
19  
20 3. Age at qualification is not an easy variable. The current authors use a cut point of 29+ at graduation.  
21 However they then divide older graduates into 29 to 31 and 32+ and find a dose-response effect. However  
22 the classification of those of 28 or less is far from obvious, and it is not clear that they are homogenous (i.e.  
23 without a dose-response effect). 32+ are different from 29-31 and <29, and it therefore seems possible that  
24 the so-called "Normal age" group [surely an unfortunate bit of phrasing?] is also heterogenous. If 23-24 is a  
25 typical post-school leaving age, and 26-27 is a typical age for graduates to qualify, then there could well be  
26 variation here. Given the large Ns then surely the data needed dividing up into something like <-23,  
27 24,25,26,27,28, 29-31, 32+ in order to see what is going on. At present the classification is too simplistic.

28  
29  
30  
31 *Our hypothesis was for "mature students" for which there is no standard definition so we chose one that we*  
32 *feel has strong face validity. We agree with Prof. McManus that there may be heterogeneity in the baseline*  
33 *group. We have therefore repeated the analyses with this group sub-divided as he has suggested. These*  
34 *additional analyses have been informative and we have now added a new supplemental table. The data*  
35 *show that, as before, the oldest group (>=32 years) are markedly worse than the younger groups but in fact*  
36 *there is little difference in the 26-31 year group in the unadjusted analysis though adjustment slightly*  
37 *increase the odds ratio for the 29-31 year group. If anything the threshold for increased problems with*  
38 *progression appears to be at 26 years and above; lower than we have previously shown. We do not feel*  
39 *this in anyway invalidates our a priori definition of "mature" student but this post-hoc analysis is of interest*  
40 *and also demonstrates the non-linearity of the relationship with age. We have added some discussion of*  
41 *this finding into the paper.*

42  
43 *We have also changed the name of the 'Normal Age' group to 'Younger group'.*

44  
45  
46  
47  
48 4. Age and age at qualification are separate, and confounded with cohort. Tiffin et al found no effect of  
49 age at all which seems difficult to reconcile with the current data. Some exploration/explanation is required.

50 *There are two issues that need to be considered here. One is the differences in the datasets and analysis*  
51 *strategy and the other is the interpretation of our results with respect to Tiffin et al.*

52 *Though the two datasets are from the same primary source and do indeed overlap temporally, they are*  
53 *different as Tiffin et al includes all non-UK graduates whilst these were explicitly excluded from our*  
54 *analyses. The Tiffin paper uses age at ARCP (parameterised as a continuous variable) whilst we have*  
55 *used age at provisional registration in much larger categorical groupings. As our hypothesis relates to age*  
56  
57  
58  
59  
60

1  
2  
3 at registration and not age at ARCP, the Tiffin results are less relevant to this, though clearly they will be  
4 correlated to some degree.

5  
6 In the univariable analysis section of the paper by Tiffin et al they state that "Increasing age (odds ratio  
7 1.04, 1.03 to 1.04)... with increased odds of obtaining a less satisfactory outcome at ARCP." The smaller  
8 effect estimate reflects the way that age was parameterised but is consistent with our results (though as we  
9 have now shown the assumption of linearity may or may not be valid). The "Age" coefficient in table 4  
10 (Odds ratio 1.00, 95% CI 0.98 to 1.01) which appears null is harder to interpret as this from a multivariable  
11 model which also includes two interaction terms with age (age and UK experience, age and non-white  
12 ethnicity).

13  
14  
15 5. I like the idea of 'graduate-friendly' medical schools, but a single cut-off seems too easy. Could we  
16 please see a plot of ARCP problem rates by percentage of 'older' graduates from each medical school.  
17 Medical schools are known to differ strongly in their success rates at MRCP/MRCGP (see the McManus  
18 paper in the same BMJ as the Tiffin paper), and in a proper analysis there would be dummy variables for  
19 medical schools in the analysis.

20  
21 Unfortunately the GMC aggregated some of the London medical schools into one group before releasing  
22 the data but we have now rerun the analysis as suggested with a dummy variable for each school and this  
23 makes almost no difference to the results. We have added a sentence to the results section to inform the  
24 readers of this analysis.

25  
26  
27 6. The tables would benefit from including Ns on a systematic basis.

28  
29  
30 We agree with this suggestion and have made this amendment.

31  
32 We thank Prof. McManus for his positive comments and suggestions.

33  
34  
35 Finally, the authors would like to highlight an additional point added to the discussion after this review. This  
36 was suggested following a presentation to the Severn Deanery Foundation Programme Away Day (Sept.  
37 2014).  
38  
39  
40  
41  
42  
43  
44  
45  
46  
47  
48  
49  
50  
51  
52  
53  
54  
55  
56  
57  
58  
59  
60

1  
2  
3  
4  
5  
6  
7  
8  
9  
10  
11  
12  
13  
14  
15  
16  
17  
18  
19  
20  
21  
22  
23  
24  
25  
26  
27  
28  
29  
30  
31  
32  
33  
34  
35  
36  
37  
38  
39  
40  
41  
42  
43  
44  
45  
46  
47  
48  
49  
50  
51  
52  
53  
54  
55  
56  
57  
58  
59  
60

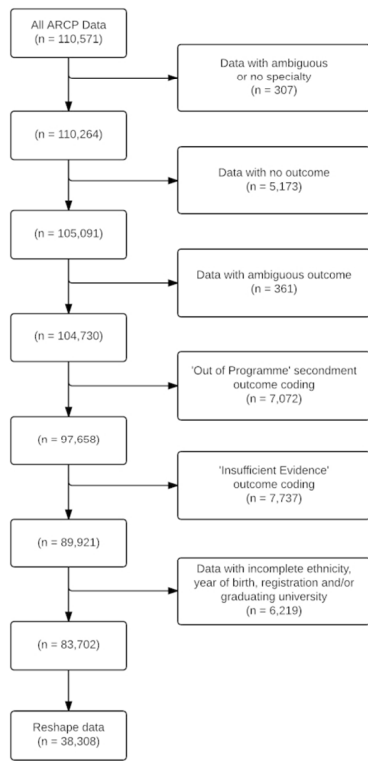

90x127mm (300 x 300 DPI)

# BMJ Open

## Older doctors and progression through specialty training in the United Kingdom: a cohort analysis of General Medical Council data.

|                                 |                                                                                                                                                                                 |
|---------------------------------|---------------------------------------------------------------------------------------------------------------------------------------------------------------------------------|
| Journal:                        | <i>BMJ Open</i>                                                                                                                                                                 |
| Manuscript ID:                  | bmjopen-2014-005658.R2                                                                                                                                                          |
| Article Type:                   | Research                                                                                                                                                                        |
| Date Submitted by the Author:   | 13-Oct-2014                                                                                                                                                                     |
| Complete List of Authors:       | Pyne, Vicky; University of Bristol, ; Ben-Schlomo, Yoav; Dept of Social Medicine                                                                                                |
| <b>Primary Subject Heading</b>: | Medical education and training                                                                                                                                                  |
| Secondary Subject Heading:      | Medical management                                                                                                                                                              |
| Keywords:                       | MEDICAL EDUCATION & TRAINING, Human resource management < HEALTH SERVICES ADMINISTRATION & MANAGEMENT, Organisational development < HEALTH SERVICES ADMINISTRATION & MANAGEMENT |
|                                 |                                                                                                                                                                                 |

SCHOLARONE™  
Manuscripts

1  
2  
3  
4  
5  
6  
7  
8  
9  
10  
11  
12  
13 **Older doctors and progression through specialty training in the United Kingdom: a cohort**  
14 **analysis of General Medical Council data.**  
15  
16

17  
18  
19 Vicky Pyne<sup>1</sup>, Yoav Ben-Shlomo<sup>2</sup>  
20  
21

22  
23  
24 1. Medical Student, University of Bristol Medical School  
25

26 2. Professor of Clinical Epidemiology, School of Social and Community Medicine, 39 Whatley  
27 Road, Bristol, BS8 2PS  
28  
29

30  
31  
32  
33 **Correspondence to:** Vicky Pyne ([vicky.pyne@doctors.org.uk](mailto:vicky.pyne@doctors.org.uk))  
34

35 Word count 2979  
36  
37  
38  
39  
40  
41  
42  
43  
44  
45  
46  
47  
48  
49  
50  
51  
52  
53  
54  
55  
56  
57  
58  
59  
60



## Abstract

Objective: To determine whether older age at graduation is associated with any difference in outcomes from the annual specialty training progression assessment.

Design: An open cohort of 38,308 doctors who graduated from a United Kingdom medical school with annual assessments of progression in their specialty training program with data centrally collected by the General Medical Council between 05/08/2009 to 31/07/2012.

Results: Mature junior doctors ( $\geq 29$  years at graduation) were more likely to have problems with progression on their ARCP/RITA than their younger colleagues (Odds ratio 1.34, 95% CI 1.22, 1.49,  $p < 0.001$ ). This association was, if anything, even stronger (Odds ratio 1.57, 95% CI 1.41, 1.74,  $p < 0.001$ ) after adjustment for gender, ethnicity, type of University and specialty. The same was true when only looking at the most extreme ARCP outcome (4) which is being asked to leave their specialist programme (Odds ratio 1.81, 95% CI 1.34, 2.44,  $p < 0.001$ ).

Conclusions: Mature doctors are a growing part of the medical workforce and they are likely to broaden the spectrum of doctors by bring different life experience to the profession. These results suggest that they are more likely to have problems with progressing through their specialist training programme. More research is required to determine the reasons behind these associations and how mature doctors can be supported both in choosing the best training programme and in coping with the complex demands of higher training at a later stage in their lives.

**Strengths of this Study**

1. First study to look at how age at graduation affects a doctor's chance of succeeding in their annual revalidation.
2. Large sample size with little missing data and minimal sources of bias for exposure and outcome variables.
3. Results are counter to prevailing beliefs that mature medical students cope better with medical training as demonstrates greater problems with progression through the ARCP process.
4. Highlights the importance of other demographic and clinical factors that determine progression in training.

**Limitations of this Study**

5. No quantitative or qualitative data to try to understand the reasons for worse progression and to what degree these are or are not academic related.
6. ARCP data is a simple measure of adequate progression and does not capture excellence so could hide a bimodal distribution whereby mature junior doctors are also more likely to excel as well as have problems of progression.

## Introduction

Over the last decade, more mature students have been welcomed onto the medical training programme. Whilst they only make up around 4% of medical students in the UK[1], they are a more substantial proportion of graduates from the USA and Canada (16.7% and 14.2% were 30 or older at graduation respectively [2] [3]). These students are often different in their outlook and abilities to a typical school leaver and may be better suited as both a student and future doctor. For example, the former director of the graduate entry programme at St George's Hospital Medical School has stated that "mature students... are sooner and better able to handle the responsibilities of being a doctor" and are "much more self-directed, challenging, demanding, questioning, and mature" than their younger counterparts [4]. These subjective views have some limited support from both qualitative and quantitative research during the medical school years, for example, older students appear to do better at year 3 OSCE exams [5]. Two studies have suggested that mature students cope better with the transition to clinical responsibilities feeling less confused, daunted, anxious or intimidated and more likely to describe a positive transition [6] [7]. This may not merely reflect greater academic experience; greater age at program entry, as opposed to the presence of a previous degree, was a better predictor for positive attributes and attitudes related to being a doctor [8]. This may reflect stronger motivational factors that lead them to positively choose medicine as a subsequent career.

Remarkably little is known about what happens to these mature graduates after they qualify. These positive attitudes could result in very focussed and determined graduates who try to reach their choice of specialist career as quickly and efficiently as possible thereby progressing through their training rapidly. On the other hand, mature graduates are more likely to have established geographical roots and family commitments that may make handling the double burdens of career and family problematic even earlier in their training as compared to younger graduates. Anecdotal evidence from the Severn Deanery has suggested that some mature students required greater

1 support with getting through their annual assessment (previously known as RITA - Record of In  
2 Training Assessment) and now referred to as ARCP (Annual Review of Competence Progression).  
3  
4 We objectively test the null hypothesis that the proportion of doctors who either require additional  
5  
6 training time or who are asked to leave the programme is the same for both older and younger  
7  
8 graduate doctors.  
9  
10  
11  
12  
13

## 14 **Methods**

### 15 *Datasource and variable definitions*

16  
17 The General Medical Council, who collate the national data on ARCP/RITA, kindly provided us  
18  
19 with an anonymised extract of data for all UK medical graduates who had a review between  
20  
21 05/08/2009 to 31/07/2012. In the United Kingdom, prior to 2013, the ARCP/RITA process begins  
22  
23 at the start of speciality training (such as surgery or primary care) and continues until completion of  
24  
25 training (obtaining a certificate of completion of training – CCT) that enables doctors to apply for a  
26  
27 consultant post.  
28  
29  
30  
31

32  
33 Because the coding of the outcomes for ARCP and RITA do not map directly onto each other, we  
34  
35 had to use slightly different definitions for our outcome measure of poor progression. For ARCP we  
36  
37 used codes 3 (requires additional training time), 4 (released from the programme) and 7.3  
38  
39 (inadequate progress) as a composite measure of poor progression. For the RITA we used codes D  
40  
41 (targeted training) and E (intensified or repeat training) as our poor outcome measure (see appendix  
42  
43 1 for the full coding scheme)[9] [10]. We choose to exclude subjects with a code for insufficient  
44  
45 evidence (as this often reflects inadequate documentation rather than poor progress per se) and  
46  
47 those trainees on an out-of-program secondment.  
48  
49  
50  
51

52  
53 Our exposure measure was based on an arbitrary age cut-off (coded as an integer value). There is no  
54  
55 accepted standard definition of a “mature” student so we chose to define this as a graduate who was  
56  
57 29 years or over at the year of first registration (i.e. year of graduation). By choosing this cut-point  
58  
59  
60

1 we hoped to not include graduates who had simply taken a gap year, intercalated BSc or a prior  
2 degree before going straight into medicine (as this should mean they are not older than 27 years) but  
3 those who would have had some years of “work” experience outside of medicine. This is similar to  
4 a previous study that defined the “older mature” as “students who have worked in other occupations  
5 for a number of years prior to making a decision to apply to medical school” [11]. We further sub-  
6 divided this ‘mature’ group into those aged between 29 years and 31 years and those who were 32  
7 years or older on date of first registration to examine for any dose-response effects with older age at  
8 registration. Finally for a sensitivity analysis we examined a more detailed classification of the  
9 younger baseline group into the following categories ( $\leq 23, 24, 25, 26, 27, 28$  years). We defined, a  
10 priori, a number of potential confounders or intermediaries that could be associated with being an  
11 older graduate and a greater probability of poor progression. These were gender, specialty,  
12 ethnicity, and whether the graduate had qualified from a “mature friendly” medical school that may  
13 be better able to help the older graduate cope with the future stresses of being a doctor. This last  
14 variable was operationalized as follows: We calculated the percentage of mature students  
15 graduating from the medical school and then created a binary variable if the percentage was greater  
16 than 10% - approximately the top quartile and these were mainly the new medical schools (e.g.  
17 Exeter, Brighton & Sussex etc.). We could not disaggregate all the London-based medical schools  
18 as they were all coded as University of London.

### 43 *Statistical methods*

44 The original dataset had multiple records for a doctor for each assessment (long format) but this  
45 could be linked by an anonymous unique identifier. We reshaped the data into wide format (one  
46 row per doctor) so each doctor is only represented once in the dataset. If the doctor had poor  
47 progression more than once, we only coded the first event. We compared simple proportions using  
48 Chi-squared tests and linear regression for continuous variables. We then calculated the crude odds  
49 ratio (95% confidence intervals, p-values) for older age at graduation and poor progression and  
50  
51  
52  
53  
54  
55  
56  
57  
58  
59  
60

1 multivariable odds ratio adjusting for gender, ethnicity (binary variable defined as non-ethnic if  
2 ticked any of the White ethnicity codes from census or ethnic minority, which included any other  
3 code), specialty (dummy variable) and mature friendly medical school (binary variable). For  
4 specialty we used hospital medicine as the baseline group as it had the largest number of doctors.  
5 We undertook a sensitivity analysis using the most extreme outcome – leaving the training  
6 programme. As this is only explicitly coded in the ARCP outcomes, we could not use subjects with  
7 RITA assessments for this secondary analysis. We examined for potential interactions between age  
8 at registration with gender and ethnicity and either failure to progress or being asked to leave the  
9 specialty.

## 20 21 22 23 24 **Results**

25 We received a total of 110,571 records (multiple assessments per doctor). We dropped 307 records  
26 (0.3%) without a specialty code and there were 5,173 records with a missing outcome (4.7%) and  
27 361 records (0.3%) with an ambiguous code that we could not use (99% of the missing outcome  
28 data came from 2012, when the GMC asked Deaneries to return forms even for doctors who were  
29 not having ARCPs as they were out of programme, on maternity leave or long term sick so these are  
30 not really missing outcomes - Andy Knapton, GMC personal communication). In addition, there  
31 were 7,072 records (6.4%) for out-of-program secondments and 7,737 records (7.0%) coded as  
32 insufficient evidence leaving us with 89,921 records. After removing incomplete data for ethnicity,  
33 year of birth, year of registration, and graduating university, we were left with 83,702 records from  
34 38,308 doctors (see figure 1) similar to the stated number of registered doctors (in Approved  
35 Practice Settings) as listed by the GMC [12]. There were 2,610 (6.8%) mature graduates (1,414  
36 between 29 and 31 years, and 1,196  $\geq$  32 years). 83.7% of assessments were ARCP and 16.3% were  
37 from the RITA. In total, 6,045 doctors (15.8%) failed at least one ARCP or RITA during the three  
38 years of recorded data and of those, 491 (1.3%) were asked to leave the specialty programme  
39 (ARCP Outcome 4).

1  
2  
3  
4 Older doctors were more likely to be male, non-ethnic minority, and train in Primary Care or Public  
5 Health ( $p < 0.001$ ) compared to younger doctors (see web table 1). Older doctors were more likely to  
6 have problems with progression (odds ratio 1.34, 95% CI 1.22, 1.49,  $p$ -value  $< 0.001$ ) (table 1).  
7  
8 After adjusting for gender, ethnicity, type of medical school, and choice of specialty, the odds ratio  
9 was further increased (OR 1.57, 95% CI 1.41, 1.74,  $p < 0.001$ ). When we broke down the older age  
10 group into three categories (non-mature, 29 to 31 years,  $\geq 32$  years), the trend was even more  
11 marked both with and without adjustment for other covariates (OR 1.0, 1.43, 1.74 respectively,  $p$ -  
12 value for trend  $< 0.001$  after multivariable adjustment). Our more detailed breakdown of the younger  
13 age group suggested that increased problems with progression are evident at a younger age, 26  
14 years and above, though the oldest group ( $\geq 32$  years) appear to have additional problems (see web  
15 table 2).  
16  
17  
18  
19  
20  
21  
22  
23  
24  
25  
26  
27  
28  
29

30 Our secondary analysis using just the extreme outcome of leaving the training programme (ARCP-  
31 4) found an even greater odds ratio of failing to progress for mature students compared to non-  
32 matures (OR 1.81, 95% CI 1.34, 2.44,  $p < 0.001$ ). When we examined this by our three level age  
33 group, we observed a non-linear trend (OR for non-mature, 29 to 31 years,  $\geq 32$  years: 1.0, 1.29,  
34 2.48 respectively,  $p$ -value for trend  $< 0.001$ ) whereby the excess risk seemed mainly limited to the  
35 oldest group ( $\geq 32$  years) (web table 3). There was no evidence of any interactions between  
36 maturity and either gender or ethnicity on failure to progress or being asked to leave the specialty.  
37  
38 The results were essentially unchanged when we replaced the type of university with a dummy  
39 variable for all universities.  
40  
41  
42  
43  
44  
45  
46  
47  
48  
49  
50

## 51 Discussion

52  
53  
54  
55 This study provides strong evidence that doctors who are older at graduation were more likely to  
56 have problems with progression at their annual assessment and were more likely to leave their  
57  
58  
59  
60

1 initial specialist training programme. These findings appeared to be independent of other factors,  
2 such as gender, ethnicity, type of medical school and speciality. The last showed wide variability  
3 with some specialties having higher (Obstetrics and Gynaecology) and others lower (General  
4 Practice and Public Health) rates of problems with progression. This finding is consistent with the  
5 results of a recent analysis comparing doctors who obtained their medical degree either in or outside  
6 of the UK and testing whether the Performance and Linguistics Assessments Board examination  
7 system explained performance at ARCP [13]. It is also consistent with the recent GMC Report on  
8 the state of medical education and practice in the UK [14] which found (in Figure 46) that doctors  
9 who were over 30 when joining the register were more likely than their younger counterparts to  
10 receive a sanction or a warning. While the null hypothesis defined 'mature' graduates as those over  
11 28 years at first registration, additional analysis has highlighted this effect is evident for doctors as  
12 young as 26 on registration, who make up over 20% of the doctor population in this sample.  
13  
14  
15  
16  
17  
18  
19  
20  
21  
22  
23  
24  
25  
26  
27  
28  
29

30 As these results are unlikely to be due to chance, one must consider other possible explanations.  
31 Bias in either measurement of exposure or outcome is very unlikely as age at graduation is taken  
32 from year of registration and year of birth so should be well recorded and any coding errors are  
33 likely to be random in nature. Similarly any coding errors in the ARCP/RITA outcomes are unlikely  
34 to be differential according to age at graduation. A very small proportion of outcome data were  
35 missing and this is unlikely to have been systematically biased. Though we attempted to control for  
36 a variety of covariates that could influence the outcome, we did not have reliable data on whether  
37 trainees were in full or part time training. The latter may be more common in mature graduates and  
38 may influence progression in training. Similarly we could not explore if there was an interaction  
39 between mature graduate status and full or part time training. In addition, ARCP is not intended to  
40 capture excellence in training but merely adequate progression. It is possible that the performance  
41 of mature graduates is bimodal so that some mature doctors actually have better outcomes but this  
42 would not be evident in our analysis.  
43  
44  
45  
46  
47  
48  
49  
50  
51  
52  
53  
54  
55  
56  
57  
58  
59  
60



1  
2  
3  
4 One must consider several possible explanations as to why older graduates have more problems  
5 progressing through higher training if we assume our observed associations are truly causal. (a)  
6  
7  
8 They may have more commitments outside of work (caring commitments for either children or  
9  
10  
11  
12  
13  
14  
15  
16  
17  
18  
19  
20  
21  
22  
23  
24  
25  
26  
27  
28  
29  
30  
31  
32  
33  
34  
35  
36  
37  
38  
39  
40  
41  
42  
43  
44  
45  
46  
47  
48  
49  
50  
51  
52  
53  
54  
55  
56  
57  
58  
59  
60

One must consider several possible explanations as to why older graduates have more problems progressing through higher training if we assume our observed associations are truly causal. (a) They may have more commitments outside of work (caring commitments for either children or parents or other personal relationship issues) that may make it harder to successfully complete all the assessments required for ARCP [11]. (b) They may find themselves committing to a specialty that may not have been their first choice in order to stay in a certain part of the country for their children or spouse. This could result in them doing less well in ARCP due a degree of ambivalence to this specialty. (c) They may have more problems passing post-graduate specialist exams or completing more technical skills competencies which result in either additional training time or in the worst case leaving the specialty. This may be one explanation why we observed the same difficulty with progression for doctors of ethnic minority background who are known to have a higher failure rate with the MRCGP exam [13][15]. (d) Being older, these doctors may find it harder to engage with the informal social support groups among junior doctors (either due to personal commitments or the age gap) and thus have fewer resources to call upon during challenging rotations or clinical situations. (e) The higher rate of leaving the programme in the oldest age group may reflect an inappropriate choice of specialty or that older graduates, having had a past career and already made one major change, have more confidence to switch specialties than younger graduates.

These results should not be interpreted as older graduates are therefore less competent doctors. The ARCP/RITA assessments are there to monitor training progression against specific competencies and milestones and are not a direct measure of the quality of doctors. Some excellent doctors simply take longer to complete their training and may have gained additional skills and life experiences on this journey, learning more from their mistakes than their successes.

1  
2 These results, however, should not be a cause for complacency. Longer training programmes exert  
3  
4 additional financial pressures on training budgets and any doctor who leaves medicine altogether at  
5  
6 this stage has had a lot of time and money invested into their training. The problem is not unique to  
7  
8 older graduates as we observed that men, ethnic minorities and some specialties showed the same  
9  
10 pattern of results.  
11

12  
13  
14  
15 In conclusion, mature doctors are part of the makeup of the NHS workforce and they widen the  
16  
17 variety of doctors as well as bringing insights from past careers that is to be welcomed. While they  
18  
19 appear to do better than their younger counterparts at university, they are more likely to have  
20  
21 problems with specialty training in the UK. We believe that the causes for this are multi-factorial  
22  
23 and probably not unique to the United Kingdom but generalisable to other high income countries  
24  
25 like the USA and Canada, though this requires empirical confirmation. These results should be an  
26  
27 impetus for further qualitative research to provide greater insights into why older graduates are  
28  
29 more like to have difficulties in progression and direct action from training programmes so that they  
30  
31 can identify problems at an earlier stage and provide greater support for such trainees as  
32  
33 appropriate.  
34  
35  
36  
37  
38  
39  
40  
41  
42  
43  
44  
45  
46  
47  
48  
49  
50  
51  
52  
53  
54  
55  
56  
57  
58  
59  
60

## References

---

- 1 Higher Education Statistics Agency. Medicine Undergraduates Data 2012-2013.
- 2 Association of American Medical Colleges. Medical School Graduation Questionnaire - 2013 All Schools Summary. 2013.
- 3 Association of American Medical Colleges. Canadian Medical School Graduation Questionnaire - 2012 All Schools Summary Report. 2012.
- 4 McCrorie P. Graduate students are more challenging, demanding, and questioning. *BMJ* 2002;**325**:676.<http://www.pubmedcentral.nih.gov/articlerender.fcgi?artid=1124216&tool=pmcentrez&rendertype=abstract> (accessed 18 Jun2013).
- 5 Lumb AB, Vail A. Comparison of academic, application form and social factors in predicting early performance on the medical course. *Med Educ* 2004;**38**:1002–5. doi:10.1111/j.1365-2929.2004.01912.x
- 6 Shacklady J, Holmes E, Mason G, *et al*. Maturity and medical students' ease of transition into the clinical environment. *Med Teach* 2009;**31**:621–6. doi:10.1080/01421590802203496
- 7 Hayes K, Feather a, Hall a, *et al*. Anxiety in medical students: is preparation for full-time clinical attachments more dependent upon differences in maturity or on educational programmes for undergraduate and graduate entry students? *Med Educ* 2004;**38**:1154–63. doi:10.1111/j.1365-2929.2004.01980.x
- 8 Wilkinson TJ, Wells JE, Bushnell J a. Are differences between graduates and undergraduates in a medical course due to age or prior degree? *Med Educ* 2004;**38**:1141–6. doi:10.1111/j.1365-2929.2004.01981.x
- 9 Annual Review of Competence Progression (ARCP) - Severn Deanery - NHS. <http://www.severndeanery.nhs.uk/about/education-and-training/doctors-in-training/annual-review-of-competence-progression-arcp/> (accessed 20 Jun2013).
- 10 MMC. The Gold Guide: A Reference Guide for Postgraduate Specialty Training in the UK (Fourth Edition). 2010.
- 11 Mathers J, Parry J. Older mature students' experiences of applying to study medicine in England: an interview study. *Med Educ* 2010;**44**:1084–94. doi:10.1111/j.1365-2923.2010.03731.x
- 12 List of Registered Medical Practitioners - statistics. [http://www.gmc-uk.org/doctors/register/search\\_stats.asp](http://www.gmc-uk.org/doctors/register/search_stats.asp) (accessed 15 Jul2013).
- 13 Tiffin PA, Illing J, Kasim AS. Annual Review of Competence Progression ( ARCP ) performance of doctors who passed Professional and Linguistic Assessments Board ( PLAB ) tests compared with UK medical graduates : national data linkage study. 2014;**2622**:1–18. doi:10.1136/bmj.g2622
- 14 General Medical Council. *The state of medical education and practice in the UK 2014*. 2014. [http://www.gmc-uk.org/SOMEPEP\\_2014.pdf\\_58053580.pdf](http://www.gmc-uk.org/SOMEPEP_2014.pdf_58053580.pdf)

1  
2  
3  
4  
5  
6  
7  
8  
9  
10  
11  
12  
13  
14  
15  
16  
17  
18  
19  
20  
21  
22  
23  
24  
25  
26  
27  
28  
29  
30  
31  
32  
33  
34  
35  
36  
37  
38  
39  
40  
41  
42  
43  
44  
45  
46  
47  
48  
49  
50  
51  
52  
53  
54  
55  
56  
57  
58  
59  
60

15 Esmail A, Roberts C. Academic performance of ethnic minority candidates and discrimination in the MRCGP examinations between 2010 and 2012: analysis of data. *BMJ* 2013;**347**:f5662. doi:10.1136/bmj.f5662

For peer review only

1  
2  
3  
4  
5  
6  
7  
8  
9  
10  
11  
12  
13  
14  
15  
16  
17  
18  
19  
20  
21  
22  
23  
24  
25  
26  
27  
28  
29  
30  
31  
32  
33  
34  
35  
36  
37  
38  
39  
40  
41  
42  
43  
44  
45  
46  
47  
48  
49  
50  
51  
52  
53  
54  
55  
56  
57  
58  
59  
60

**Ethical approval:** We did not seek formal NHS ethical approval for this study as it was a secondary data analysis of existing data that had been anonymized to ensure data confidentiality.

**Acknowledgements:** The author would like to acknowledge Andy Knapton and Daniel Smith at the General Medical Council (GMC) for their support, guidance and encouragement and the GMC for providing us the data for our research. Finally, we would thank Dr. Clare Van Hamel, Associate Postgraduate Dean and Director of Severn Deanery Foundation School for her anecdotal comments that stimulated this project.

**Conflicts of interest:** All authors have completed the ICMJE uniform disclosure form at [www.icmje.org/coi\\_disclosure.pdf](http://www.icmje.org/coi_disclosure.pdf) and declare: no support from any organisation for the submitted work; no financial relationships with any organisations that might have an interest in the submitted work in the previous three years. VP is a mature medical student and was therefore curious to find out how mature students perform after qualification. YBS has no conflict of interest but regularly sits on ARCP committees for Public Health trainees. No funding was required or obtained for this study.

**Copyright Statement:** The Corresponding Author has the right to grant on behalf of all authors and does grant on behalf of all authors, [a worldwide licence](#) to the Publishers and its licensees in perpetuity, in all forms, formats and media (whether known now or created in the future), to i) publish, reproduce, distribute, display and store the Contribution, ii) translate the Contribution into other languages, create adaptations, reprints, include within collections and create summaries, extracts and/or, abstracts of the Contribution, iii) create any other derivative work(s) based on the Contribution, iv) to exploit all subsidiary rights in the Contribution, v) the inclusion of electronic links from the Contribution to third party material where-ever it may be located; and, vi) licence any third party to do any or all of the above.”

1  
2  
3  
4 **Authors' contributions:** VP conceived of the idea for this piece of work as her student SSC and  
5  
6 approached the GMC for data access. YBS acted as her SSC supervisor and provided support and  
7  
8 training for the statistical analysis. VP undertook the initial data cleaning and analysis. YBS  
9  
10 checked the analyses and undertook some additional analyses. VP drafted the first version of the  
11  
12 paper that was then edited by YBS. All authors approved the final version of the manuscript. VP  
13  
14 acts as the guarantor.  
15  
16  
17  
18

19 **Transparency declaration:** VP affirms that the manuscript is an honest, accurate, and transparent  
20  
21 account of the study being reported; that no important aspects of the study have been omitted; and  
22  
23 that any discrepancies from the study as planned (and, if relevant, registered) have been explained.  
24  
25  
26  
27

28 **Data Sharing Statement:** No additional data available.  
29

30 **Figure 1:** A flow chart showing losses of data due to incomplete or inadequate data to reach the  
31  
32 final study sample.  
33  
34  
35  
36  
37  
38  
39  
40  
41  
42  
43  
44  
45  
46  
47  
48  
49  
50  
51  
52  
53  
54  
55  
56  
57  
58  
59  
60

**Table 1:** Association between ‘Mature status’ and failure to progress at ARCP adjusted for a range of potential confounders.

|                                         | <b>Model 1*</b>     |                | <b>Model 2*</b>     |                |
|-----------------------------------------|---------------------|----------------|---------------------|----------------|
|                                         | <b>OR (95% CI)</b>  | <b>p Value</b> | <b>OR (95% CI)</b>  | <b>p Value</b> |
| Older (≥29 years)<br>(2,610)            | 1.34 (1.22 to 1.49) | <0.001         | 1.57 (1.41 to 1.74) | <0.001         |
| Younger group (≤28 years)<br>(35,698)   | 1.00                |                | 1.00                |                |
| Older group (29 to 31 years)<br>(1,414) | 1.27 (1.11 to 1.46) | 0.001          | 1.43 (1.24 to 1.65) | <0.001         |
| Oldest group (≥32 years)<br>(1,196)     | 1.43 (1.24 to 1.65) | <0.001         | 1.74 (1.50 to 2.02) | <0.001         |
| p-value for trend                       |                     | <0.001         |                     | <0.001         |
| Female gender<br>(21,470)               |                     |                | 0.82 (0.77 to 0.87) | <0.001         |
| Ethnic minority<br>(11,338)             |                     |                | 1.59 (1.49 to 1.68) | <0.001         |
| Mature Friendly University<br>(35,745)  |                     |                | 1.18 (1.06 to 1.32) | 0.003          |
| <b>First Specialty</b>                  |                     |                |                     |                |
| Medicine (10,135)                       |                     |                | 1.00                |                |
| ACCS & related (5,827)                  |                     |                | 1.00 (0.92 to 1.08) | 0.93           |
| Surgery (6,077)                         |                     |                | 0.84 (0.77 to 0.91) | <0.001         |
| GP & Public Health (9,094)              |                     |                | 0.26 (0.24 to 0.29) | <0.001         |
| O&G (1,528)                             |                     |                | 2.16 (1.91 to 2.43) | <0.001         |
| Paediatrics (2,791)                     |                     |                | 0.81 (0.72 to 0.90) | <0.001         |
| Pathology (564)                         |                     |                | 0.84 (0.67 to 1.06) | 0.14           |
| Psychiatry (966)                        |                     |                | 0.51 (0.42 to 0.63) | <0.001         |
| Radiology (1,326)                       |                     |                | 0.88 (0.76 to 1.02) | 0.10           |

\*Model 1, simple odds ratio; Model 2 for binary age-group after adjustment for all covariates as shown in table except for the three level age group variable. This model was then rerun with the three level age-group and other covariates to examine for a dose-response effect

1  
2  
3  
4  
5  
6  
7  
8  
9  
10  
11  
12  
13 Older doctors and progression through specialty training in the United Kingdom: a cohort analysis  
14 of General Medical Council data.  
15

16  
17  
18  
19 Vicky Pyne<sup>1</sup>, Yoav Ben-Shlomo<sup>2</sup>  
20  
21

22  
23  
24 1. Medical Student, University of Bristol Medical School  
25

26 2. Professor of Clinical Epidemiology, School of Social and Community Medicine, 39 Whatley  
27 Road, Bristol, BS8 2PS  
28  
29

30  
31  
32  
33 **Correspondence to:** Vicky Pyne ([vicky.pyne@doctors.org.uk](mailto:vicky.pyne@doctors.org.uk))  
34

35 Word count 2979  
36  
37  
38  
39  
40  
41  
42  
43  
44  
45  
46  
47  
48  
49  
50  
51  
52  
53  
54  
55  
56  
57  
58  
59  
60



1  
2  
3  
4  
5  
6  
7  
8  
9  
10  
11  
12  
13  
14  
15  
16  
17  
18  
19  
20  
21  
22  
23  
24  
25  
26  
27  
28  
29  
30  
31  
32  
33  
34  
35  
36  
37  
38  
39  
40  
41  
42  
43  
44  
45  
46  
47  
48  
49  
50  
51  
52  
53  
54  
55  
56  
57  
58  
59  
60

**Ethical approval:** We did not seek formal NHS ethical approval for this study as it was a secondary data analysis of existing data that had been anonymized to ensure data confidentiality.

**Acknowledgements:** The author would like to acknowledge Andy Knapton and Daniel Smith at the General Medical Council (GMC) for their support, guidance and encouragement and the GMC for providing us the data for our research. Finally, we would thank Dr. Clare Van Hamel, Associate Postgraduate Dean and Director of Severn Deanery Foundation School for her anecdotal comments that stimulated this project.

**Conflicts of interest:** All authors have completed the ICMJE uniform disclosure form at [www.icmje.org/coi\\_disclosure.pdf](http://www.icmje.org/coi_disclosure.pdf) and declare: no support from any organisation for the submitted work; no financial relationships with any organisations that might have an interest in the submitted work in the previous three years. VP is a mature medical student and was therefore curious to find out how mature students perform after qualification. YBS has no conflict of interest but regularly sits on ARCP committees for Public Health trainees. No funding was required or obtained for this study.

**Copyright Statement:** The Corresponding Author has the right to grant on behalf of all authors and does grant on behalf of all authors, [a worldwide licence](#) to the Publishers and its licensees in perpetuity, in all forms, formats and media (whether known now or created in the future), to i) publish, reproduce, distribute, display and store the Contribution, ii) translate the Contribution into other languages, create adaptations, reprints, include within collections and create summaries, extracts and/or, abstracts of the Contribution, iii) create any other derivative work(s) based on the Contribution, iv) to exploit all subsidiary rights in the Contribution, v) the inclusion of electronic links from the Contribution to third party material where-ever it may be located; and, vi) licence any third party to do any or all of the above.”

1  
2  
3  
4 **Authors' contributions:** VP conceived of the idea for this piece of work as her student SSC and  
5  
6 approached the GMC for data access. YBS acted as her SSC supervisor and provided support and  
7  
8 training for the statistical analysis. VP undertook the initial data cleaning and analysis. YBS  
9  
10 checked the analyses and undertook some additional analyses. VP drafted the first version of the  
11  
12 paper that was then edited by YBS. All authors approved the final version of the manuscript. VP  
13  
14 acts as the guarantor.  
15  
16  
17  
18

19 **Transparency declaration:** VP affirms that the manuscript is an honest, accurate, and transparent  
20  
21 account of the study being reported; that no important aspects of the study have been omitted; and  
22  
23 that any discrepancies from the study as planned (and, if relevant, registered) have been explained.  
24  
25  
26  
27

28 **Data Sharing Statement:** No additional data available.  
29  
30  
31  
32  
33  
34  
35  
36  
37  
38  
39  
40  
41  
42  
43  
44  
45  
46  
47  
48  
49  
50  
51  
52  
53  
54  
55  
56  
57  
58  
59  
60

## Abstract

Objective: To determine whether older age at graduation is associated with any difference in outcomes from the annual specialty training progression assessment.

Design: An open cohort of 38,308 doctors who graduated from a United Kingdom medical school with annual assessments of progression in their specialty training program with data centrally collected by the General Medical Council between 05/08/2009 to 31/07/2012.

Results: Mature junior doctors ( $\geq 29$  years at graduation) were more likely to have problems with progression on their ARCP/RITA than their younger colleagues (Odds ratio 1.34, 95% CI 1.22, 1.49,  $p < 0.001$ ). This association was, if anything, even stronger (Odds ratio 1.57, 95% CI 1.41, 1.74,  $p < 0.001$ ) after adjustment for gender, ethnicity, type of University and specialty. The same was true when only looking at the most extreme ARCP outcome (4) which is being asked to leave their specialist programme (Odds ratio 1.81, 95% CI 1.34, 2.44,  $p < 0.001$ ).

Conclusions: Mature doctors are a growing part of the medical workforce and they are likely to broaden the spectrum of doctors by bring different life experience to the profession. These results suggest that they are more likely to have problems with progressing through their specialist training programme. More research is required to determine the reasons behind these associations and how mature doctors can be supported both in choosing the best training programme and in coping with the complex demands of higher training at a later stage in their lives.

**Strengths of this Study**

1. First study to look at how age at graduation affects a doctor's chance of succeeding in their annual revalidation.
2. Large sample size with little missing data and minimal sources of bias for exposure and outcome variables.
3. Results are counter to prevailing beliefs that mature medical students cope better with medical training as demonstrates greater problems with progression through the ARCP process.
4. Highlights the importance of other demographic and clinical factors that determine progression in training.

**Limitations of this Study**

5. No quantitative or qualitative data to try to understand the reasons for worse progression and to what degree these are or are not academic related.
6. ARCP data is a simple measure of adequate progression and does not capture excellence so could hide a bimodal distribution whereby mature junior doctors are also more likely to excel as well as have problems of progression.

## Introduction

Over the last decade, more mature students have been welcomed onto the medical training programme. Whilst they only make up around 4% of medical students in the UK[1], they are a more substantial proportion of graduates from the USA and Canada (16.7% and 14.2% were 30 or older at graduation respectively [2] [3]). These students are often different in their outlook and abilities to a typical school leaver and may be better suited as both a student and future doctor. For example, the former director of the graduate entry programme at St George's Hospital Medical School has stated that "mature students... are sooner and better able to handle the responsibilities of being a doctor" and are "much more self-directed, challenging, demanding, questioning, and mature" than their younger counterparts [4]. These subjective views have some limited support from both qualitative and quantitative research during the medical school years, for example, older students appear to do better at year 3 OSCE exams [5]. Two studies have suggested that mature students cope better with the transition to clinical responsibilities feeling less confused, daunted, anxious or intimidated and more likely to describe a positive transition [6] [7]. This may not merely reflect greater academic experience; greater age at program entry, as opposed to the presence of a previous degree, was a better predictor for positive attributes and attitudes related to being a doctor [8]. This may reflect stronger motivational factors that lead them to positively choose medicine as a subsequent career.

Remarkably little is known about what happens to these mature graduates after they qualify. These positive attitudes could result in very focussed and determined graduates who try to reach their choice of specialist career as quickly and efficiently as possible thereby progressing through their training rapidly. On the other hand, mature graduates are more likely to have established geographical roots and family commitments that may make handling the double burdens of career and family problematic even earlier in their training as compared to younger graduates. Anecdotal evidence from the Severn Deanery has suggested that some mature students required greater

1 support with getting through their annual assessment (previously known as RITA - Record of In  
2 Training Assessment) and now referred to as ARCP (Annual Review of Competence Progression).  
3  
4 We objectively test the null hypothesis that the proportion of doctors who either require additional  
5  
6 training time or who are asked to leave the programme is the same for both older and younger  
7  
8 graduate doctors.  
9  
10  
11  
12  
13

## 14 **Methods**

### 15 *Datasource and variable definitions*

16  
17 The General Medical Council, who collate the national data on ARCP/RITA, kindly provided us  
18  
19 with an anonymised extract of data for all UK medical graduates who had a review between  
20  
21 05/08/2009 to 31/07/2012. In the United Kingdom, prior to 2013, the ARCP/RITA process begins  
22  
23 at the start of speciality training (such as surgery or primary care) and continues until completion of  
24  
25 training (obtaining a certificate of completion of training – CCT) that enables doctors to apply for a  
26  
27 consultant post.  
28  
29  
30  
31  
32  
33  
34

35 Because the coding of the outcomes for ARCP and RITA do not map directly onto each other, we  
36  
37 had to use slightly different definitions for our outcome measure of poor progression. For ARCP we  
38  
39 used codes 3 (requires additional training time), 4 (released from the programme) and 7.3  
40  
41 (inadequate progress) as a composite measure of poor progression. For the RITA we used codes D  
42  
43 (targeted training) and E (intensified or repeat training) as our poor outcome measure (see appendix  
44  
45 1 for the full coding scheme)[9] [10]. We choose to exclude subjects with a code for insufficient  
46  
47 evidence (as this often reflects inadequate documentation rather than poor progress per se) and  
48  
49 those trainees on an out-of-program secondment.  
50  
51  
52  
53

54 Our exposure measure was based on an arbitrary age cut-off (coded as an integer value). There is no  
55  
56 accepted standard definition of a “mature” student so we chose to define this as a graduate who was  
57  
58 29 years or over at the year of first registration (i.e. year of graduation). By choosing this cut-point  
59  
60

1 we hoped to not include graduates who had simply taken a gap year, intercalated BSc or a prior  
2 degree before going straight into medicine (as this should mean they are not older than 27 years) but  
3 those who would have had some years of “work” experience outside of medicine. This is similar to  
4 a previous study that defined the “older mature” as “students who have worked in other occupations  
5 for a number of years prior to making a decision to apply to medical school” [11]. We further sub-  
6 divided this ‘mature’ group into those aged between 29 years and 31 years and those who were 32  
7 years or older on date of first registration to examine for any dose-response effects with older age at  
8 registration. Finally for a sensitivity analysis we examined a more detailed classification of the  
9 younger baseline group into the following categories ( $\leq 23, 24, 25, 26, 27, 28$  years). We defined, a  
10 priori, a number of potential confounders or intermediaries that could be associated with being an  
11 older graduate and a greater probability of poor progression. These were gender, specialty,  
12 ethnicity, and whether the graduate had qualified from a “mature friendly” medical school that may  
13 be better able to help the older graduate cope with the future stresses of being a doctor. This last  
14 variable was operationalized as follows: We calculated the percentage of mature students  
15 graduating from the medical school and then created a binary variable if the percentage was greater  
16 than 10% - approximately the top quartile and these were mainly the new medical schools (e.g.  
17 Exeter, Brighton & Sussex etc.). We could not disaggregate all the London-based medical schools  
18 as they were all coded as University of London.

### 43 *Statistical methods*

44 The original dataset had multiple records for a doctor for each assessment (long format) but this  
45 could be linked by an anonymous unique identifier. We reshaped the data into wide format (one  
46 row per doctor) so each doctor is only represented once in the dataset. If the doctor had poor  
47 progression more than once, we only coded the first event. We compared simple proportions using  
48 Chi-squared tests and linear regression for continuous variables. We then calculated the crude odds  
49 ratio (95% confidence intervals, p-values) for older age at graduation and poor progression and  
50  
51  
52  
53  
54  
55  
56  
57  
58  
59  
60

1 multivariable odds ratio adjusting for gender, ethnicity (binary variable defined as non-ethnic if  
2 ticked any of the White ethnicity codes from census or ethnic minority, which included any other  
3 code), specialty (dummy variable) and mature friendly medical school (binary variable). For  
4 specialty we used hospital medicine as the baseline group as it had the largest number of doctors.  
5 We undertook a sensitivity analysis using the most extreme outcome – leaving the training  
6 programme. As this is only explicitly coded in the ARCP outcomes, we could not use subjects with  
7 RITA assessments for this secondary analysis. We examined for potential interactions between age  
8 at registration with gender and ethnicity and either failure to progress or being asked to leave the  
9 specialty.

## 23 Results

24 We received a total of 110,571 records (multiple assessments per doctor). We dropped 307 records  
25 (0.3%) without a specialty code and there were 5,173 records with a missing outcome (4.7%) and  
26 361 records (0.3%) with an ambiguous code that we could not use (99% of the missing outcome  
27 data came from 2012, when the GMC asked Deaneries to return forms even for doctors who were  
28 not having ARCPs as they were out of programme, on maternity leave or long term sick so these are  
29 not really missing outcomes - Andy Knapton, GMC personal communication). In addition, there  
30 were 7,072 records (6.4%) for out-of-program secondments and 7,737 records (7.0%) coded as  
31 insufficient evidence leaving us with 89,921 records. After removing incomplete data for ethnicity,  
32 year of birth, year of registration, and graduating university, we were left with 83,702 records from  
33 38,308 doctors (see figure 1) similar to the stated number of registered doctors (in Approved  
34 Practice Settings) as listed by the GMC [12]. There were 2,610 (6.8%) mature graduates (1,414  
35 between 29 and 31 years, and 1,196  $\geq$  32 years). 83.7% of assessments were ARCP and 16.3% were  
36 from the RITA. In total, 6,045 doctors (15.8%) failed at least one ARCP or RITA during the three  
37 years of recorded data and of those, 491 (1.3%) were asked to leave the specialty programme  
38 (ARCP Outcome 4).



1  
2  
3  
4 Older doctors were more likely to be male, non-ethnic minority, and train in Primary Care or Public  
5 Health ( $p < 0.001$ ) compared to younger doctors (see web table 1). Older doctors were more likely to  
6 have problems with progression (odds ratio 1.34, 95% CI 1.22, 1.49,  $p$ -value  $< 0.001$ ) (table 1).  
7  
8

9  
10 After adjusting for gender, ethnicity, type of medical school, and choice of specialty, the odds ratio  
11 was further increased (OR 1.57, 95% CI 1.41, 1.74,  $p < 0.001$ ). When we broke down the older age  
12 group into three categories (non-mature, 29 to 31 years,  $\geq 32$  years), the trend was even more  
13 marked both with and without adjustment for other covariates (OR 1.0, 1.43, 1.74 respectively,  $p$ -  
14 value for trend  $< 0.001$  after multivariable adjustment). Our more detailed breakdown of the younger  
15 age group suggested that increased problems with progression are evident at a younger age, 26  
16 years and above, though the oldest group ( $\geq 32$  years) appear to have additional problems (see web  
17 table 2).  
18  
19  
20  
21  
22  
23  
24  
25  
26  
27  
28  
29

30 Our secondary analysis using just the extreme outcome of leaving the training programme (ARCP-  
31 4) found an even greater odds ratio of failing to progress for mature students compared to non-  
32 matures (OR 1.81, 95% CI 1.34, 2.44,  $p < 0.001$ ). When we examined this by our three level age  
33 group, we observed a non-linear trend (OR for non-mature, 29 to 31 years,  $\geq 32$  years: 1.0, 1.29,  
34 2.48 respectively,  $p$ -value for trend  $< 0.001$ ) whereby the excess risk seemed mainly limited to the  
35 oldest group ( $\geq 32$  years) (web table 3). There was no evidence of any interactions between  
36 maturity and either gender or ethnicity on failure to progress or being asked to leave the specialty.  
37  
38 The results were essentially unchanged when we replaced the type of university with a dummy  
39 variable for all universities.  
40  
41  
42  
43  
44  
45  
46  
47  
48  
49  
50  
51  
52

### 53 Discussion

54  
55 This study provides strong evidence that doctors who are older at graduation were more likely to  
56 have problems with progression at their annual assessment and were more likely to leave their  
57  
58  
59  
60

1 initial specialist training programme. These findings appeared to be independent of other factors,  
2 such as gender, ethnicity, type of medical school and speciality. The last showed wide variability  
3 with some specialties having higher (Obstetrics and Gynaecology) and others lower (General  
4 Practice and Public Health) rates of problems with progression. This finding is consistent with the  
5 results of a recent analysis comparing doctors who obtained their medical degree either in or outside  
6 of the UK and testing whether the Performance and Linguistics Assessments Board examination  
7 system explained performance at ARCP [13]. It is also consistent with the recent GMC Report on  
8 the state of medical education and practice in the UK [14] which found (in Figure 46) that doctors  
9 who were over 30 when joining the register were more likely than their younger counterparts to  
10 receive a sanction or a warning. While the null hypothesis defined 'mature' graduates as those over  
11 28 years at first registration, additional analysis has highlighted this effect is evident for doctors as  
12 young as 26 on registration, who make up over 20% of the doctor population in this sample.  
13  
14  
15  
16  
17  
18  
19  
20  
21  
22  
23  
24  
25  
26  
27  
28  
29

30 As these results are unlikely to be due to chance, one must consider other possible explanations.  
31 Bias in either measurement of exposure or outcome is very unlikely as age at graduation is taken  
32 from year of registration and year of birth so should be well recorded and any coding errors are  
33 likely to be random in nature. Similarly any coding errors in the ARCP/RITA outcomes are unlikely  
34 to be differential according to age at graduation. A very small proportion of outcome data were  
35 missing and this is unlikely to have been systematically biased. Though we attempted to control for  
36 a variety of covariates that could influence the outcome, we did not have reliable data on whether  
37 trainees were in full or part time training. The latter may be more common in mature graduates and  
38 may influence progression in training. Similarly we could not explore if there was an interaction  
39 between mature graduate status and full or part time training. In addition, ARCP is not intended to  
40 capture excellence in training but merely adequate progression. It is possible that the performance  
41 of mature graduates is bimodal so that some mature doctors actually have better outcomes but this  
42 would not be evident in our analysis.  
43  
44  
45  
46  
47  
48  
49  
50  
51  
52  
53  
54  
55  
56  
57  
58  
59  
60

1  
2  
3  
4 One must consider several possible explanations as to why older graduates have more problems  
5 progressing through higher training if we assume our observed associations are truly causal. (a)  
6  
7 They may have more commitments outside of work (caring commitments for either children or  
8  
9 parents or other personal relationship issues) that may make it harder to successfully complete all  
10  
11 the assessments required for ARCP [11]. (b) They may find themselves committing to a specialty  
12  
13 that may not have been their first choice in order to stay in a certain part of the country for their  
14  
15 children or spouse. This could result in them doing less well in ARCP due a degree of ambivalence  
16  
17 to this specialty. (c) They may have more problems passing post-graduate specialist exams or  
18  
19 completing more technical skills competencies which result in either additional training time or in  
20  
21 the worst case leaving the specialty. This may be one explanation why we observed the same  
22  
23 difficulty with progression for doctors of ethnic minority background who are known to have a  
24  
25 higher failure rate with the MRCGP exam [13][15]<sup>14</sup>. (d) Being older, these doctors may find it  
26  
27 harder to engage with the informal social support groups among junior doctors (either due to  
28  
29 personal commitments or the age gap) and thus have fewer resources to call upon during  
30  
31 challenging rotations or clinical situations. (e) The higher rate of leaving the programme in the  
32  
33 oldest age group may reflect an inappropriate choice of specialty or that older graduates, having had  
34  
35 a past career and already made one major change, have more confidence to switch specialties than  
36  
37 younger graduates.  
38  
39  
40  
41  
42  
43  
44  
45

46 These results should not be interpreted as older graduates are therefore less competent doctors. The  
47  
48 ARCP/RITA assessments are there to monitor training progression against specific competencies  
49  
50 and milestones and are not a direct measure of the quality of doctors. Some excellent doctors simply  
51  
52 take longer to complete their training and may have gained additional skills and life experiences on  
53  
54 this journey, learning more from their mistakes than their successes.  
55  
56  
57  
58  
59  
60

1  
2 These results, however, should not be a cause for complacency. Longer training programmes exert  
3  
4 additional financial pressures on training budgets and any doctor who leaves medicine altogether at  
5  
6 this stage has had a lot of time and money invested into their training. The problem is not unique to  
7  
8 older graduates as we observed that men, ethnic minorities and some specialties showed the same  
9  
10 pattern of results.  
11

12  
13  
14  
15 In conclusion, mature doctors are part of the makeup of the NHS workforce and they widen the  
16  
17 variety of doctors as well as bringing insights from past careers that is to be welcomed. While they  
18  
19 appear to do better than their younger counterparts at university, they are more likely to have  
20  
21 problems with specialty training in the UK. We believe that the causes for this are multi-factorial  
22  
23 and probably not unique to the United Kingdom but generalisable to other high income countries  
24  
25 like the USA and Canada, though this requires empirical confirmation. These results should be an  
26  
27 impetus for further qualitative research to provide greater insights into why older graduates are  
28  
29 more like to have difficulties in progression and direct action from training programmes so that they  
30  
31 can identify problems at an earlier stage and provide greater support for such trainees as  
32  
33 appropriate.  
34  
35  
36  
37  
38  
39  
40  
41  
42  
43  
44  
45  
46  
47  
48  
49  
50  
51  
52  
53  
54  
55  
56  
57  
58  
59  
60

## References

---

- 1 Higher Education Statistics Agency. Medicine Undergraduates Data 2012-2013.
- 2 Association of American Medical Colleges. Medical School Graduation Questionnaire - 2013 All Schools Summary. 2013.
- 3 Association of American Medical Colleges. Canadian Medical School Graduation Questionnaire - 2012 All Schools Summary Report. 2012.
- 4 McCrorie P. Graduate students are more challenging, demanding, and questioning. *BMJ* 2002;**325**:676. <http://www.pubmedcentral.nih.gov/articlerender.fcgi?artid=1124216&tool=pmcentrez&rendertype=abstract> (accessed 18 Jun2013).
- 5 Lumb AB, Vail A. Comparison of academic, application form and social factors in predicting early performance on the medical course. *Med Educ* 2004;**38**:1002–5. doi:10.1111/j.1365-2929.2004.01912.x
- 6 Shacklady J, Holmes E, Mason G, *et al*. Maturity and medical students' ease of transition into the clinical environment. *Med Teach* 2009;**31**:621–6. doi:10.1080/01421590802203496
- 7 Hayes K, Feather a, Hall a, *et al*. Anxiety in medical students: is preparation for full-time clinical attachments more dependent upon differences in maturity or on educational programmes for undergraduate and graduate entry students? *Med Educ* 2004;**38**:1154–63. doi:10.1111/j.1365-2929.2004.01980.x
- 8 Wilkinson TJ, Wells JE, Bushnell J a. Are differences between graduates and undergraduates in a medical course due to age or prior degree? *Med Educ* 2004;**38**:1141–6. doi:10.1111/j.1365-2929.2004.01981.x
- 9 Annual Review of Competence Progression (ARCP) - Severn Deanery - NHS. <http://www.severndeanery.nhs.uk/about/education-and-training/doctors-in-training/annual-review-of-competence-progression-arcp/> (accessed 20 Jun2013).
- 10 MMC. The Gold Guide: A Reference Guide for Postgraduate Specialty Training in the UK (Fourth Edition). 2010.
- 11 Mathers J, Parry J. Older mature students' experiences of applying to study medicine in England: an interview study. *Med Educ* 2010;**44**:1084–94. doi:10.1111/j.1365-2923.2010.03731.x
- 12 List of Registered Medical Practitioners - statistics. [http://www.gmc-uk.org/doctors/register/search\\_stats.asp](http://www.gmc-uk.org/doctors/register/search_stats.asp) (accessed 15 Jul2013).
- 13 Tiffin PA, Illing J, Kasim AS. Annual Review of Competence Progression ( ARCP ) performance of doctors who passed Professional and Linguistic Assessments Board ( PLAB ) tests compared with UK medical graduates : national data linkage study. 2014;**2622**:1–18. doi:10.1136/bmj.g2622
- 14 General Medical Council. *The state of medical education and practice in the UK 2014*. 2014. [http://www.gmc-uk.org/SOMEPEP\\_2014.pdf\\_58053580.pdf](http://www.gmc-uk.org/SOMEPEP_2014.pdf_58053580.pdf)

1  
2  
3  
4  
5  
6  
7  
8  
9  
10  
11  
12  
13  
14  
15  
16  
17  
18  
19  
20  
21  
22  
23  
24  
25  
26  
27  
28  
29  
30  
31  
32  
33  
34  
35  
36  
37  
38  
39  
40  
41  
42  
43  
44  
45  
46  
47  
48  
49  
50  
51  
52  
53  
54  
55  
56  
57  
58  
59  
60

15 Esmail A, Roberts C. Academic performance of ethnic minority candidates and discrimination in the MRCGP examinations between 2010 and 2012: analysis of data. *BMJ* 2013;**347**:f5662. doi:10.1136/bmj.f5662

For peer review only

**Table 1:** Association between ‘Mature status’ and failure to progress at ARCP adjusted for a range of potential confounders.

|                                              | <b>Model 1*</b>     |                | <b>Model 2*</b>     |                |
|----------------------------------------------|---------------------|----------------|---------------------|----------------|
|                                              | <b>OR (95% CI)</b>  | <b>p Value</b> | <b>OR (95% CI)</b>  | <b>p Value</b> |
| Older ( $\geq 29$ years)<br>(2,610)          | 1.34 (1.22 to 1.49) | <0.001         | 1.57 (1.41 to 1.74) | <0.001         |
| Younger group ( $\leq 28$ years)<br>(35,698) | 1.00                |                | 1.00                |                |
| Older group (29 to 31 years)<br>(1,414)      | 1.27 (1.11 to 1.46) | 0.001          | 1.43 (1.24 to 1.65) | <0.001         |
| Oldest group ( $\geq 32$ years)<br>(1,196)   | 1.43 (1.24 to 1.65) | <0.001         | 1.74 (1.50 to 2.02) | <0.001         |
| p-value for trend                            |                     | <0.001         |                     | <0.001         |
| Female gender<br>(21,470)                    |                     |                | 0.82 (0.77 to 0.87) | <0.001         |
| Ethnic minority<br>(11,338)                  |                     |                | 1.59 (1.49 to 1.68) | <0.001         |
| Mature Friendly University<br>(35,745)       |                     |                | 1.18 (1.06 to 1.32) | 0.003          |
| <b>First Specialty</b>                       |                     |                |                     |                |
| Medicine (10,135)                            |                     |                | 1.00                |                |
| ACCS & related (5,827)                       |                     |                | 1.00 (0.92 to 1.08) | 0.93           |
| Surgery (6,077)                              |                     |                | 0.84 (0.77 to 0.91) | <0.001         |
| GP & Public Health (9,094)                   |                     |                | 0.26 (0.24 to 0.29) | <0.001         |
| O&G (1,528)                                  |                     |                | 2.16 (1.91 to 2.43) | <0.001         |
| Paediatrics (2,791)                          |                     |                | 0.81 (0.72 to 0.90) | <0.001         |
| Pathology (564)                              |                     |                | 0.84 (0.67 to 1.06) | 0.14           |
| Psychiatry (966)                             |                     |                | 0.51 (0.42 to 0.63) | <0.001         |
| Radiology (1,326)                            |                     |                | 0.88 (0.76 to 1.02) | 0.10           |

\*Model 1, simple odds ratio; Model 2 for binary age-group after adjustment for all covariates as shown in table except for the three level age group variable. This model was then rerun with the three level age-group and other covariates to examine for a dose-response effect

**Figure 1:** A flow chart showing losses of data due to incomplete or inadequate data to reach the final study sample.

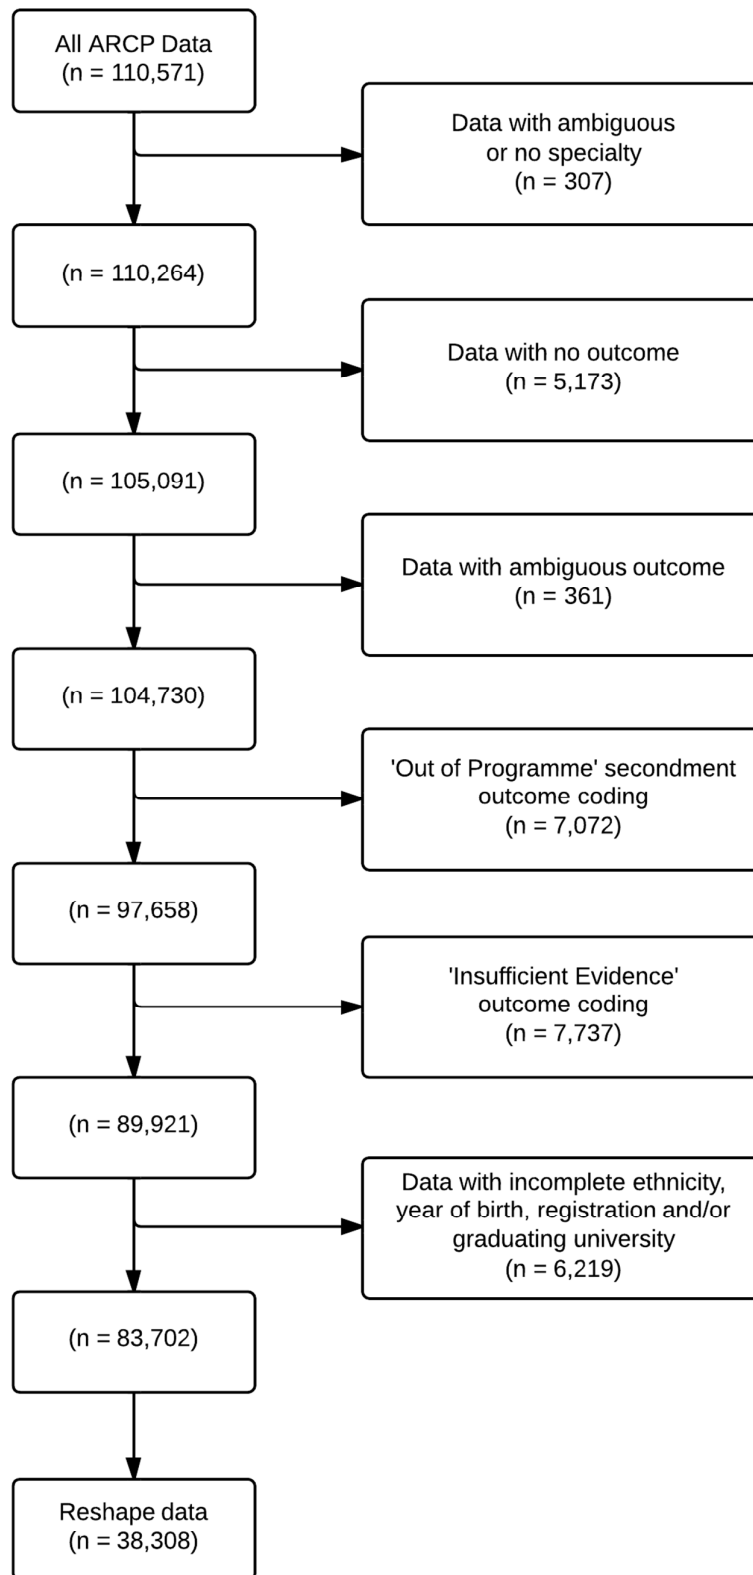



## Appendix 1: ACRP/RITA Outcome categories

| ARCP        |                                                                                                                                                                           |
|-------------|---------------------------------------------------------------------------------------------------------------------------------------------------------------------------|
| Outcome 1   | Satisfactory Progress                                                                                                                                                     |
| Outcome 2   | Unsatisfactory Progress - Development of specific competences required, additional training time not required                                                             |
| Outcome 3   | Unsatisfactory Progress - Inadequate progress by the trainee, additional training time required                                                                           |
| Outcome 4   | Unsatisfactory Progress - Released from the training programme with or without specified competences; trainee will be required to give up their National Training Number. |
| Outcome 5   | Incomplete evidence presented.                                                                                                                                            |
| Outcome 6   | Recommendation for completion of training.                                                                                                                                |
| Outcome 7   | Fixed-term specialty outcome:                                                                                                                                             |
| Outcome 7.1 | - Satisfactory progress in or completion of the LAT / FTSTA placement.                                                                                                    |
| Outcome 7.2 | - Development of Specific Competences Required – additional training time not required                                                                                    |
| Outcome 7.3 | - Inadequate progress by trainee                                                                                                                                          |
| Outcome 7.4 | - Incomplete evidence presented                                                                                                                                           |
| Outcome 8   | Out of programme for research, approved clinical training or a career break (OOPR/OOPT/OOPC).                                                                             |
| Outcome 9   | For doctors undertaking top-up training in a training post.                                                                                                               |
| RITA        |                                                                                                                                                                           |
| C           | Satisfactory progress                                                                                                                                                     |
| D           | Recommendation for targeted training                                                                                                                                      |
| E           | Records a recommendation for intensified supervision/repeated experience.                                                                                                 |
| F           | Records out-of-programme experience (including maternity leave)                                                                                                           |
| G           | Provides a final record of satisfactory progress on completion of training.                                                                                               |

1  
2  
3  
4  
5  
6  
7  
8  
9  
10  
11  
12  
13  
14  
15  
16  
17  
18  
19  
20  
21  
22  
23  
24  
25  
26  
27  
28  
29  
30  
31  
32  
33  
34  
35  
36  
37  
38  
39  
40  
41  
42  
43  
44  
45  
46  
47  
48  
49  
50  
51  
52  
53  
54  
55  
56  
57  
58  
59  
60



90x127mm (300 x 300 DPI)

Web Table 1: Association between mature status and other covariates\*

|                                | Normal age<br>(≤28 years) | Older group<br>(29 to 31 years) | Oldest group<br>(≥32 years) |
|--------------------------------|---------------------------|---------------------------------|-----------------------------|
| <b>Gender</b>                  |                           |                                 |                             |
| Male                           | 43.4% (15,484)            | 50.7 % (717)                    | 53.3% (637)                 |
| Female                         | 56.6% (20,214)            | 49.3% (697)                     | 46.7% (559)                 |
| <b>Ethnic Minority</b>         |                           |                                 |                             |
| Non-Ethnic Minority            | 69.7% (24,883)            | 77.8% (1,100)                   | 82.5% (987)                 |
| Ethnic Minority                | 30.3% (10,815)            | 22.2% (314)                     | 17.5% (209)                 |
| <b>Graduating University</b>   |                           |                                 |                             |
| Mature Friendly University     | 94.1% (33,580)            | 84.8% (1,199)                   | 80.8% (966)                 |
| Non-Mature Friendly University | 5.9% (2,118)              | 15.2% (215)                     | 19.2% (230)                 |
| <b>First Specialty</b>         |                           |                                 |                             |
| Medicine                       | 94.8% (9,604)             | 2.9 (296)                       | 2.6% (235)                  |
| ACCS & related                 | 94.2% (5,487)             | 3.3% (191)                      | 2.6% (149)                  |
| Surgery                        | 93.0% (5,648)             | 4.2% (252)                      | 2.9% (177)                  |
| GP & Public Health             | 90.1% (8,190)             | 4.9% (446)                      | 5% (458)                    |
| O&G                            | 93.6% (1,430)             | 3.3% (50)                       | 3.1% (48)                   |
| Paediatrics                    | 95.9% (2,674)             | 2.6% (73)                       | 1.6% (44)                   |
| Pathology                      | 89.5% (505)               | 5.1% (29)                       | 5.3% (30)                   |
| Psychiatry                     | 93.5% (903)               | 3.9% (38)                       | 2.6% (25)                   |
| Radiology                      | 94.8% (1,257)             | 2.9% (39)                       | 2.3% (30)                   |
| <b>TOTAL</b>                   |                           |                                 | 100% (35,698)               |

\*All associations were unlikely to have occurred by chance ( $p < 0.001$ )

Web Table 2: Multivariable association of age at graduation and failure to progress at ARCP using more detailed age-bands and adjusted for a range of potential confounders.

|                                          | OR (95% CI)         | p Value |
|------------------------------------------|---------------------|---------|
| ≤ 23 years old (8,453)                   | 1.05 (0.97 to 1.14) | 0.23    |
| 24 years old (13,997)                    | 1.0                 |         |
| 25 years old (7,951)                     | 1.12 (1.04 to 1.21) | <0.001  |
| 26 years old (2,738)                     | 1.50 (1.35 to 1.67) | <0.001  |
| 27 years old (1,614)                     | 1.50 (1.31 to 1.72) | <0.001  |
| 28 years old (945)                       | 1.55 (1.30 to 1.84) | <0.001  |
| 29 to 31 years old (Older group) (1,414) | 1.6 (1.38 to 1.85)  | <0.001  |
| ≥ 32 years old (Oldest group) (1,196)    | 1.95 (1.67 to 2.28) | <0.001  |
| p-value for trend                        | <0.001              |         |
| Female gender                            | 0.83 (0.78 to 0.88) | <0.001  |
| Ethnic Minority                          | 1.59 (1.50 to 1.69) | <0.001  |
| Mature Friendly University               | 1.12 (1.00 to 1.26) | 0.04    |
| <b>First Specialty</b>                   |                     |         |
| ACCS & related                           | 1.00 (0.92 to 1.08) | 0.91    |
| Medicine                                 | 1.0                 |         |
| Surgery                                  | 0.84 (0.77 to 0.91) | <0.001  |
| GP & Public Health                       | 0.26 (0.23 to 0.29) | <0.001  |
| O&G                                      | 2.13 (1.89 to 2.40) | <0.001  |
| Paediatrics                              | 0.81 (0.72 to 0.91) | <0.001  |
| Pathology                                | 0.83 (0.66 to 1.05) | 0.12    |
| Psychiatry                               | 0.50 (0.41 to 0.62) | <0.001  |
| Radiology                                | 0.89 (0.77 to 1.03) | 0.13    |

Web Table 3: Multivariable association of 'Mature status' and being asked to leave specialty at ARCP (code 4) adjusted for a range of covariates\*.

|                                  | OR (95% CI)         | p Value |
|----------------------------------|---------------------|---------|
| Older ( $\geq 29$ years)         | 1.81 (1.34 to 2.44) | <0.001  |
| Younger group ( $\leq 28$ years) |                     |         |
| Older group (29 to 31 years)     | 1.29 (0.82 to 2.03) | 0.28    |
| Oldest group ( $\geq 32$ years)  | 2.48 (1.69 to 3.62) | <0.001  |
| p-value for trend                | <0.001              |         |
| Female gender                    | 0.78 (0.65 to 0.94) | 0.01    |
| Ethnic Minority                  | 1.52 (1.26 to 1.83) | <0.001  |
| Mature Friendly University       | 1.24 (0.89 to 1.73) | 0.21    |
| First Specialty                  |                     |         |
| ACCS & related                   | 0.99 (0.78 to 1.25) | 0.95    |
| Medicine                         | 1.0                 |         |
| Surgery                          | 0.51 (0.39 to 0.68) | <0.001  |
| GP & Public Health               | 0.22 (0.16 to 0.31) | <0.001  |
| O&G                              | 0.49 (0.25 to 0.79) | 0.005   |
| Paediatrics                      | 0.74 (0.62 to 1.25) | 0.48    |
| Pathology                        | -                   | -       |
| Psychiatry                       | 0.47 (0.24 to 0.91) | 0.03    |
| Radiology                        | 0.18 (0.07 to 0.43) | <0.0001 |

\* Model run with binary age-group after adjustment for all covariates as shown in table except for the three level age group variable. This model was then rerun with the three level age-group and other covariates to examine for a dose-response effect

## Appendix 1: ACRP/RITA Outcome categories

| ARCP        |                                                                                                                                                                           |
|-------------|---------------------------------------------------------------------------------------------------------------------------------------------------------------------------|
| Outcome 1   | Satisfactory Progress                                                                                                                                                     |
| Outcome 2   | Unsatisfactory Progress - Development of specific competences required, additional training time not required                                                             |
| Outcome 3   | Unsatisfactory Progress - Inadequate progress by the trainee, additional training time required                                                                           |
| Outcome 4   | Unsatisfactory Progress - Released from the training programme with or without specified competences; trainee will be required to give up their National Training Number. |
| Outcome 5   | Incomplete evidence presented.                                                                                                                                            |
| Outcome 6   | Recommendation for completion of training.                                                                                                                                |
| Outcome 7   | Fixed-term specialty outcome:                                                                                                                                             |
| Outcome 7.1 | - Satisfactory progress in or completion of the LAT / FTSTA placement.                                                                                                    |
| Outcome 7.2 | - Development of Specific Competences Required – additional training time not required                                                                                    |
| Outcome 7.3 | - Inadequate progress by trainee                                                                                                                                          |
| Outcome 7.4 | - Incomplete evidence presented                                                                                                                                           |
| Outcome 8   | Out of programme for research, approved clinical training or a career break (OOPR/OOPT/OOPC).                                                                             |
| Outcome 9   | For doctors undertaking top-up training in a training post.                                                                                                               |
| RITA        |                                                                                                                                                                           |
| C           | Satisfactory progress                                                                                                                                                     |
| D           | Recommendation for targeted training                                                                                                                                      |
| E           | Records a recommendation for intensified supervision/repeated experience.                                                                                                 |
| F           | Records out-of-programme experience (including maternity leave)                                                                                                           |
| G           | Provides a final record of satisfactory progress on completion of training.                                                                                               |
